# Supplementary material
Source: publisher figshare collection journal article supplement (https://tandf.figshare.com/articles/dataset/_/5505022)
Supplement: Supplementary file 1 [file 1]

## Appendix 2. Specimen measurements

### Morphological abbreviations

**Ap**: apical angle; **C**: direction of helical whorl progression expressed as either dextral (**dx**) or sinistral (**s**); **Cd**: coil diameter of helical whorl; **Ci**: costal index; **Cu**: angle of gyroconic coil curvature; **Cv**: the number of costae per quarter volution transecting the ventrolateral margin. Values in brackets denote the number of costae per 360° volution which may be obtained through extrapolation expressed as  $(Cv \times 4) - 3$  to account for the costae beginning subsequent quarterly volution increments; **D**: dorsum; **Dp**: dorsum at body chamber aperture (peristome); **Di**: angle of limb divergence from elbow axis; **F<sub>1</sub>–F<sub>2</sub>**: flank-to-flank whorl breadth measurement transversal along helical axis of final volution; **Fb**: constriction furrow breadth as a measurement of costal interspace; **H**: angle between helical whorl and retroversal axes; **P**: phragmacone terminus at lowest septal saddle; **T**: intact shell thickness; **U**: umbilical diameter; **V**: venter; **Wb**: whorl breadth; **Wh**: whorl height; **Xr**: whorl expansion rate. Measurement approximations are median values indicated as follows: **a**: the figure is an extrapolation where a portion of the shell is absent; **d**: the figure is an inference based on a measured section with deformation; **e**: the figure is an estimate where structural dimensions are not fully exposed from surrounding matrix.

Blank cells denote zero value or no data.

### Family Baculitidae Gill, 1871

Table 1.1

| <i>Fresvillia constricta</i> Kennedy, 1986b |                           |             | Shaft         |     |    | Tube Dimensions |                 |      |      |        |       |
|---------------------------------------------|---------------------------|-------------|---------------|-----|----|-----------------|-----------------|------|------|--------|-------|
|                                             |                           |             | Constrictions |     |    | Expansion Rate  |                 |      |      | Length | Shell |
| Repository                                  | Accession No.             | In-text No. | Wh            | Wb  | Fb | Wh <sub>1</sub> | Wh <sub>2</sub> | L    | Xr   | L      | T     |
| RBCM                                        | RBCM.EH2016.006.0002.001  | RBCM.1      |               |     |    | 0.3             | 2               | 24.6 | 6.91 | 25.2   | 0.1   |
| RBCM                                        | RBCM.EH2014.003.0001.002  | RBCM.2      |               |     |    | 3               | 3.5             | 15.7 | 3.18 | 15.7   | 0.2   |
| RBCM                                        | RBCM.EH2008.011.10672.001 | RBCM.3      | 6.9           | 6.9 |    | 5.2             | 7               | 43   | 4.18 | 43     | 0.3 e |
| RBCM                                        | RBCM.EH2014.003.0001.014  |             |               |     |    | 0.9             | 1.7             | 12.2 | 6.56 | 12.3   | 0.3   |
| RBCM                                        | RBCM.EH2014.003.0001.016  |             |               |     |    | 1.8             | 2.2             | 6.8  | 5.88 | 11.9   | 0.2   |
| RBCM                                        | RBCM.EH2014.003.0001.013  |             |               |     |    | 1.9             | 2.4             | 6.8  | 7.35 | 8      | 0.2   |
| RBCM                                        | RBCM.EH2014.003.0001.012  |             |               |     |    | 2.3             | 3.4             | 16.3 | 6.75 | 18.6   | 0.2   |
| RBCM                                        | RBCM.EH2014.003.0001.010  |             |               |     |    | 2.7             | 3.2             | 10.5 | 4.76 | 12.2   | 0.2   |
| RBCM                                        | RBCM.EH2014.003.0001.006  |             |               |     |    | 2.8             | 3.6             | 15   | 5.33 | 15     | 0.2   |
| RBCM                                        | RBCM.EH2014.003.0001.003  |             |               |     |    | 3.1             | 4.1             | 20.7 | 4.83 | 39.5   | 0.2   |
| RBCM                                        | RBCM.EH2014.003.0001.015  |             |               |     |    | 3.1             | 3.7             | 14.6 | 4.11 | 14.6   | 0.2   |
| RBCM                                        | RBCM.EH2014.003.0001.007  |             |               |     |    | 3.4             | 4               | 11   | 5.45 | 13.1   | 0.2   |
| RBCM                                        | RBCM.EH2014.003.0001.011  |             |               |     |    | 3.4             | 3.7             | 7.8  | 3.85 | 13.1   | 0.2   |
| RBCM                                        | RBCM.EH2014.003.0001.009  |             |               |     |    | 3.7             | 4.1             | 10   | 4    | 12.7   | 0.2   |
| RBCM                                        | RBCM.EH2014.003.0001.004  |             |               |     |    | 3.9             | 5.6             | 33.6 | 5.06 | 39     | 0.2   |
| RBCM                                        | RBCM.EH2014.003.0001.008  |             |               |     |    | 4.2             | 4.4             | 13.1 | 1.53 | 16.4   | 0.2   |
| RBCM                                        | RBCM.EH2014.003.0001.005  |             |               |     |    | 5.2             | 5.4             | 12.5 | 1.6  | 23.5   | 0.2   |

# Family *Diplomoceratidae* Spath, 1926

Table 1.2

| <i>D. (Diplomoceras) cylindraceum</i> (Defrance, 1816) |                           |             | Elbows |                                |       |        |    |                                |       |        |       |                                |        |      |      |                                | Helical Whorls |     |    |       |     |      |      | Tube Dimensions |                 |                 |        |       |      |     |
|--------------------------------------------------------|---------------------------|-------------|--------|--------------------------------|-------|--------|----|--------------------------------|-------|--------|-------|--------------------------------|--------|------|------|--------------------------------|----------------|-----|----|-------|-----|------|------|-----------------|-----------------|-----------------|--------|-------|------|-----|
|                                                        |                           |             | Order  | D <sub>1</sub> -V <sub>1</sub> |       |        |    | D <sub>2</sub> -V <sub>2</sub> |       |        |       | D <sub>3</sub> -V <sub>3</sub> |        |      |      | Limb Proximity                 |                |     |    |       |     |      |      |                 | Expansion Rate  |                 | Length | Shell |      |     |
| Repository                                             | Accession No.             | In-text No. |        | Wh                             | Wb    | Wb/h   | Ci | Wh                             | Wb    | Wb/h   |       | Wh                             | Wb     | Wb/h | Ci   | D <sub>1</sub> -D <sub>3</sub> | Di             | Wh  | Ci | R / W | U   | Cd   | U/Cd | C               | Wh <sub>1</sub> | Wh <sub>2</sub> | L      | Xr    | L    | T   |
| RBCM                                                   | RBCM.EH2008.011.10222.006 | RBCM.4      |        |                                |       |        |    |                                |       |        |       |                                |        |      |      |                                |                |     |    |       |     |      |      | s               | 1.4             | 2               | 7.4    | 8.1   | 7.4  |     |
| RBCM                                                   | RBCM.EH2008.011.10222.002 | RBCM.5      |        |                                |       |        |    |                                |       |        |       |                                |        |      |      |                                |                | 2.6 | 8  | 24    | 5.7 | 10.1 | 0.56 | s               | 1.1             | 3.3             | 19.2   | 11.46 | 19.2 |     |
| RBCM                                                   | RBCM.EH2008.011.10222.003 | RBCM.6      |        |                                |       |        |    |                                |       |        |       |                                |        |      |      |                                |                | 2.9 | 8  | 26    | 7   | 12.3 | 0.57 | s               | 1.5             | 2.9             | 19.8   | 7.07  | 19.8 |     |
| RBCM                                                   | RBCM.EH2008.011.10214.001 | RBCM.7      |        |                                |       |        |    |                                |       |        |       |                                |        |      |      |                                |                | 4.2 | 11 | 25    | 6.6 | 13.5 | 0.49 | s               | 1.9             | 3.6             | 14.2   | 11.97 | 35.2 | 0.1 |
| RBCM                                                   | RBCM.EH2008.011.10222.004 | RBCM.8      |        |                                |       |        |    |                                |       |        |       |                                |        |      |      |                                |                | 3.9 | 9  | 23    | 7.1 | 13.8 | 0.51 | s               | 3               | 4.7             | 17     | 10    | 17   |     |
| RBCM                                                   | RBCM.EH2016.004.0001.001  | RBCM.9      |        |                                |       |        |    |                                |       |        |       |                                |        |      |      |                                |                | 4.4 | 8  | 25    | 7.8 | 13.5 | 0.58 | s               | 2               | 5.9             | 43.3   | 9     | 43.3 | 0.1 |
| RBCM                                                   | RBCM.EH2008.011.10222.001 | RBCM.10     | 1      | 4.9                            | 4.5 e | 0.92 e | 12 | 6.3                            | 5.4 e | 0.86 e | 7.5 a |                                |        |      |      | 11.1 a                         | 25°            | 2.7 | 8  | 23    | 6.2 | 11.3 | 0.55 | s               | 5.3             | 7.3             | 20     | 10    | 60.4 | 0.1 |
| RBCM                                                   | RBCM.EH2014.003.0001.001  |             | 1      | 4.6                            |       |        | 12 | 5.1                            | 4.4 e | 0.86 e | 6.4   | 5.5 e                          | 0.86 e | 12   | 10.6 | 23°                            |                |     |    |       |     |      |      | s               | 4.4             | 7.6             | 55     | 5.82  | 55   | 0.2 |
| RBCM                                                   | RBCM.EH2004.012.0097.001  |             |        |                                |       |        |    |                                |       |        |       |                                |        |      |      |                                |                | 3.5 | 7  | 23    | 5.9 | 12.4 | 0.48 | s               | 2.1             | 3.7             | 14.3   | 11.19 | 19   |     |
| RBCM                                                   | RBCM.EH2008.011.10222.005 |             |        |                                |       |        |    |                                |       |        |       |                                |        |      |      |                                |                | 2.2 | 7  | 23    |     |      |      | s               | 1.9             | 2.7             | 9.5    | 8.42  | 19   |     |
| RBCM                                                   | RBCM.EH2004.012.0147.001  |             |        |                                |       |        |    |                                |       |        |       |                                |        |      |      |                                |                | 3.7 | 7  |       |     |      |      | s               |                 |                 |        |       |      |     |

Table 1.3

| <i>D. (Diplomoceras) cylindraceum</i> (Defrance, 1816) |                           |             | Elbows |                                |        |        |      |                                |        |        |        |                                |        |      |        |                                | Limbs |                         |        |        |      |               | Tube Dimensions |        |                |                 |                 |       |        |                |       |
|--------------------------------------------------------|---------------------------|-------------|--------|--------------------------------|--------|--------|------|--------------------------------|--------|--------|--------|--------------------------------|--------|------|--------|--------------------------------|-------|-------------------------|--------|--------|------|---------------|-----------------|--------|----------------|-----------------|-----------------|-------|--------|----------------|-------|
|                                                        |                           |             | Order  | D <sub>1</sub> -V <sub>1</sub> |        |        |      | D <sub>2</sub> -V <sub>2</sub> |        |        |        | D <sub>3</sub> -V <sub>3</sub> |        |      |        | Limb Proximity                 |       | Independent Limb Points |        |        |      | Constrictions |                 |        | Expansion Rate |                 |                 |       | Length | Shell          |       |
| Repository                                             | Accession No.             | In-text No. |        | Wh                             | Wb     | Wb/h   | Ci   | Wh                             | Wb     | Wb/h   |        | Wh                             | Wb     | Wb/h | Ci     | D <sub>1</sub> -D <sub>3</sub> | Di    | Order                   | Wh     | Wb     | Wb/h | Ci            | Wh              | Wb     | Fb             | Wh <sub>1</sub> | Wh <sub>2</sub> | L     | Xr     | L              | T     |
| QBM                                                    | P2015.173                 |             | 3      | 40.5                           | 34.5   | 0.85   | 12   | 40.7                           | 35.5   | 0.87   | 42.7   | 37.8                           | 0.89   | 13   | 27.3   | 7°                             |       | 4                       |        |        |      |               | 41.7            | 36.5   | 2              | 40.3            | 45.8            | 223.4 | 2.46   | 248.8 + 26.4 d | 0.7   |
| RBCM                                                   | RBCM.EH2015.003.0001.001  | RBCM.11     |        |                                |        |        |      |                                |        |        |        |                                |        |      |        |                                |       | 2                       | 9.1    | 8.3    | 0.91 | 9             |                 |        |                |                 |                 |       |        | 47.2           | 0.4   |
| RBCM                                                   | RBCM.EH2008.011.10220.001 | RBCM.12     |        |                                |        |        |      |                                |        |        |        |                                |        |      |        |                                |       | 2                       | 8.9    | 7.8    | 0.88 | 9             |                 |        |                | 9.1             | 9.7             | 20.9  | 2.87   | 46.5           | 0.3 e |
|                                                        |                           |             |        |                                |        |        |      |                                |        |        |        |                                |        |      |        |                                |       |                         | 9.2    |        |      | 10            |                 |        |                |                 |                 |       |        |                |       |
| RBCM                                                   | RBCM.EH2008.011.10234.001 | RBCM.13     | 2      | 11 d                           |        |        | 9 d  | 9.9                            | 9.2 e  | 0.93 e | 13     |                                |        |      |        | 10.5                           | 14°   | 3                       |        |        |      |               | 12.3            |        | 1.6            | 11              | 12.8            | 23.2  | 7.76   | 53.2           |       |
| GSC                                                    | GSC 5958                  |             | 2      | 11.4                           | 10.2 e | 0.89 e | 8    | 10.2                           | 8.9 e  | 0.87 e | 12.3   |                                |        | 8 a  | 10.6   | 7°                             |       | 3                       |        |        |      |               | 12.1            |        | 1.4            | 10.1            | 12.8            | 83.9  | 3.22   | 94.7           | 0.4   |
| RBCM                                                   | RBCM.EH2008.011.10223.001 | RBCM.14     | 2      | 16.1                           | 14.8 e | 0.92   | 11   | 18                             | 14.6 e | 0.81   | 20.4   | 18.5                           | 0.91   | 13 a | 27.5   | 21°                            |       | 2                       |        |        |      |               |                 | 15.5   | 1.7            | 14.9            | 18              | 116.7 | 2.66   | 160            |       |
|                                                        |                           |             |        |                                |        |        |      |                                |        |        |        |                                |        |      |        |                                |       | 3                       |        |        |      |               |                 | 2.4    |                |                 |                 |       |        |                |       |
| RBCM                                                   | RBCM.EH2008.011.10232.001 | RBCM.15     | 2      | 15                             | 12.7 e | 0.85 e | 10 a | 15.6                           | 12.8 e | 0.82 e | 16.9   |                                |        |      | 13     | 20.4 a                         | 5° a  | 3                       |        |        |      |               | 15              | 12.4 e | 1              | 14.9            | 16              | 37.1  | 2.96   | 108            | 0.5   |
|                                                        |                           |             |        |                                |        |        |      |                                |        |        |        |                                |        |      |        |                                |       |                         |        |        |      |               | 15.5            |        | 1.3            |                 |                 |       |        |                |       |
| RBCM                                                   | RBCM.EH2008.011.10224.001 | RBCM.16     | 2      | 13.9                           | 12.7   | 0.91   | 8    | 15                             | 12.6 e | 0.84 e | 16.1   |                                |        |      | 11     | 14.4                           | 7°    | 2                       |        |        |      |               | 13.6            | 12 e   | 1.8            | 12.6            | 15.1            | 95.1  | 2.63   | 224.4          |       |
|                                                        |                           |             |        |                                |        |        |      |                                |        |        |        |                                |        |      |        |                                |       | 3                       |        |        |      |               | 14.5            | 12.4 e | 1.8            |                 |                 |       |        |                |       |
|                                                        |                           |             |        |                                |        |        |      |                                |        |        |        |                                |        |      |        |                                |       |                         |        |        |      |               | 16.2            | 13.2 e | 1.6            |                 |                 |       |        |                |       |
|                                                        |                           |             |        |                                |        |        |      |                                |        |        |        |                                |        |      |        |                                |       |                         |        |        |      |               | 16.8 e          | 14.8 e | 1.2            |                 |                 |       |        |                |       |
|                                                        |                           |             |        |                                |        |        |      |                                |        |        |        |                                |        |      |        |                                |       |                         |        |        |      |               | 17.2 e          | 15.2 e | 1.3            |                 |                 |       |        |                |       |
| RBCM                                                   | RBCM.EH2008.011.10431.001 | RBCM.17     | 2      | 15.9                           | 14.4 e | 0.91   | 8    | 16.5 a                         | 15.2 e | 0.92   | 19.6   | 17.1                           | 0.87   | 12   | 21.6 e | 10°                            |       | 2                       |        |        |      |               | 13.4 e          |        | 1.7            | 16.1            | 27.6            | 195.9 | 5.87   | 218.7          | 0.3 e |
|                                                        |                           |             |        |                                |        |        |      |                                |        |        |        |                                |        |      |        |                                |       | 3                       |        |        |      |               | 15.3 e          |        | 1.4            |                 |                 |       |        |                |       |
|                                                        |                           |             |        |                                |        |        |      |                                |        |        |        |                                |        |      |        |                                |       |                         |        |        |      |               | 20.3            |        | 1.6            |                 |                 |       |        |                |       |
|                                                        |                           |             |        |                                |        |        |      |                                |        |        |        |                                |        |      |        |                                |       |                         |        |        |      |               | 22.6 e          |        | 2.1            |                 |                 |       |        |                |       |
|                                                        |                           |             |        |                                |        |        |      |                                |        |        |        |                                |        |      |        |                                |       |                         |        |        |      |               | 25.4 e          |        | 2.1            |                 |                 |       |        |                |       |
| RBCM                                                   | RBCM.EH2008.011.10228.001 | RBCM.18     | 2      | 15.9                           | 13.6 e | 0.86 e | 12   | 15.9                           | 14.2 e | 0.89   | 20.1   | 17 e                           | 0.85 e | 13   | 17.5   | 13°                            |       | 2                       |        |        |      |               | 14.2 a          | 10.1 a | 1.3 a          | 14.4            | 20.9            | 107   | 6.07   | 107 + 18.6 a   | 0.3   |
|                                                        |                           |             |        |                                |        |        |      |                                |        |        |        |                                |        |      |        |                                |       | 3                       |        |        |      |               | 20              | 17 e   | 1.4            |                 |                 |       |        |                |       |
| RBCM                                                   | RBCM.EH2008.011.10236.001 | RBCM.19     | 2      | 15.2                           | 13.3 e | 0.88 e | 11   | 17.6                           | 14.3 e | 0.81 e | 22.3 d |                                |        |      | 15 d   | 15.5                           | 8°    | 3                       |        |        |      |               |                 |        |                | 13.7            | 17.6            | 85.5  | 4.56   | 215.5          | 0.5   |
| RBCM                                                   | RBCM.EH2008.011.10237.001 | RBCM.20     | 2      | 19.5                           | 15.2 e | 0.78 e | 14   | 21.6                           | 17.6 e | 0.81 e | 21.8   | 18 e                           | 0.83 e | 12   | 32.7   | 18°                            |       | 3                       |        |        |      |               | 21.6            | 16 e   | 2.2            | 19.5            | 22.6            | 74.8  | 4.14   | 96.8           |       |
| RBCM                                                   | RBCM.EH2008.011.06044.001 | RBCM.22     | 3      |                                |        |        |      | 45.3                           | 41.8   | 0.92   | 50.7   | 43.3                           | 0.85   | 13   |        |                                |       | 4                       | 54     | 46     | 0.85 | 12            |                 |        |                | 42.8            | 52.3            | 163.6 | 5.81   | 326.4          | 0.6   |
| RBCM                                                   | RBCM.EH2008.011.10301.001 | RBCM.23     |        |                                |        |        |      |                                |        |        |        |                                |        |      |        |                                |       | 4                       | 54.6   | 46.6   | 0.85 | 13            |                 |        |                |                 |                 |       |        | 170            | 0.6   |
| RBCM                                                   | RBCM.EH2008.011.10290.001 | RBCM.24     |        |                                |        |        |      |                                |        |        |        |                                |        |      |        |                                |       | 4                       | 53 a   | 45 a   | 0.85 | 16 a          |                 |        |                |                 |                 |       |        | 160            | 0.7   |
|                                                        |                           |             |        |                                |        |        |      |                                |        |        |        |                                |        |      |        |                                |       |                         | 56.2 a | 46.2 a | 0.82 | 18 a          |                 |        |                |                 |                 |       |        |                |       |
| RBCM                                                   | RBCM.EH2008.011.10231.001 |             | 2      | 21.1                           | 17.8 e | 0.84 e | 11   | 21.2                           | 18.5 e | 0.87 e | 23.8   | 19.2 e                         | 0.81 e | 13   | 16.8   | 5°                             |       | 2                       |        |        |      |               | 23.1            | 20 e   | 2.2            | 18.8            | 24.5            | 129.2 | 4.41   | 170.8          | 0.6   |
|                                                        |                           |             |        |                                |        |        |      |                                |        |        |        |                                |        |      |        |                                |       | 3                       |        |        |      |               | 24              | 20 e   | 2              |                 |                 |       |        |                |       |
| RBCM                                                   | RBCM.EH2008.011.10225.001 |             | 2      | 16.3                           | 12.8 e | 0.79 e | 10   | 19.2                           | 13.5 d | 0.70 e | 21     |                                |        |      | 15     | 14                             | 10°   | 3                       |        |        |      |               | 16.7 a          | 12     | 1.6            | 14.9            | 21              | 117   | 5.21   | 134.8          |       |
| CDM                                                    | 2008.1.66 HUN             |             | 2      | 14.7 e                         | 12.7 e | 0.86 e | 10 e | 15.8                           | 13.3   | 0.84   | 17.8   | 13.2 e                         | 0.74 e | 13   | 17.6 e | 16°                            |       | 3                       |        |        |      |               | 16.2            | 13.5   | 1              | 46.9            | 15.8            | 19.6  | 8.1    | 46.9           | 0.4   |
| RBCM                                                   | RBCM.EH2008.011.10235.001 |             | 2      | 23.5 e                         | 16.8 e | .71 e  | 10 e |                                |        |        | 26.4 d |                                |        |      | 11 d   | 19 e                           | 15° a | 3                       |        |        |      |               | 22 e            |        | 1.8            | 20.7            | 23.8            | 66.4  | 4.67   | 70 + 33 d      | 0.6   |
| CDM                                                    | 2002.76.1                 |             | 2      | 21.2                           | 16.1   | 0.76   | 9    | 24 e                           | 18 e   | 0.75 e | 25.3   | 20                             | 0.79   | 10   | 23 e   |                                |       | 3                       |        |        |      |               | 24.5            | 19.4   | 2.4            |                 |                 |       |        |                |       |
| RBCM                                                   | RBCM.EH2008.011.10239.001 |             | 2      | 9.8 d                          | 8.4 e  | 0.9 e  | 7 d  | 11 e                           | 10.2 e | 0.93 e | 15 e   | 12 e                           | 0.8 e  | 9 e  | 9.2    | 12°                            |       | 3                       |        |        |      |               | 11.7            | 9.9    | 1.2            |                 |                 |       |        | 45             | 0.3 e |
| RBCM                                                   | RBCM.EH2008.011.10240.001 |             | 2      | 18 d                           |        |        | 10 d | 22.2 e                         | 18.6 e | 0.84 e | 21.5   | 18 e                           | 0.84 e | 12   | 15 d   | 4° d                           |       | 3                       |        |        |      |               | 20.4            | 15.4 e | 1.8            |                 |                 |       |        | 162.1 d        | 0.5   |
| RBCM                                                   | RBCM.EH2008.011.10233.001 |             | 2      | 17 d                           |        |        | 10   | 17.8 d                         | 14.9 d | 0.84 d | 22     |                                |        |      | 16     | 22.6 d                         | 17°   | 3                       |        |        |      |               | 18 d            | 15.6 d | 1.2            |                 |                 |       |        | 147.9 d        |       |
|                                                        |                           |             |        |                                |        |        |      |                                |        |        |        |                                |        |      |        |                                |       |                         |        |        |      |               | 24 d            |        | 2.4            |                 |                 |       |        |                |       |
|                                                        |                           |             |        |                                |        |        |      |                                |        |        |        |                                |        |      |        |                                |       | 2                       | 13.5   |        |      | 10            |                 |        |                |                 |                 |       |        | 47.7           | 0.4   |
| RBCM                                                   | RBCM.EH2016.005.0027.001  |             | 2      | 18.6                           |        |        | 10   | 20.5                           |        |        | 21.9   | 17.9                           | 0.82   | 13 a | 21.1   | 19°                            |       |                         |        |        |      |               |                 |        |                | 18.6            | 21.9            | 77.8  | 4.24   | 77.8           | 0.6   |
| RBCM                                                   | RBCM.EH2008.011.10229.001 |             | 2      | 18.8                           | 16.5   | 0.88   | 12   | 20.1                           | 16.9   | 0.84   |        |                                |        |      |        |                                |       |                         |        |        |      |               |                 |        |                |                 |                 |       |        | 100.8          |       |
| RBCM                                                   | RBCM.EH2008.011.10226.001 |             | 2      | 19.5 e                         |        |        | 10 d | 24.2 d                         |        |        | 24.4 d |                                |        | 11 d | 18 d   | 5° d                           |       |                         |        |        |      |               |                 |        |                |                 |                 |       |        | 124.7 d        | 0.4   |
| RBCM                                                   | RBCM.EH2008.011.10336.001 |             | 2      | 16                             | 14.6   | 0.91   | 14 a | 19 a                           |        |        | 19.9   | 16.4                           | 0.82   | 13 a | 19.9   | 11° a                          |       |                         |        |        |      |               |                 |        |                |                 |                 |       |        | 57.5 + 53 a    |       |

Table 1.3 Continued

|      |                            |   |        |        |        |        |        |        |        |        |        |   |        |        |        |        |        |        |            |       |
|------|----------------------------|---|--------|--------|--------|--------|--------|--------|--------|--------|--------|---|--------|--------|--------|--------|--------|--------|------------|-------|
| RBCM | RBCM.EH2004.012.0101.001   | 2 | 15.1   | 9      | 15.4   | 19.4   | 13.4 d | 0.69 d | 12 a   | 24.5   | 19°    | 2 | 13.7 a | 1.8    | 15.3   | 18.8   | 85.7   | 4.08   | 125.3      | 0.3   |
| RBCM | RBCM.EH2008.011.10227.001  | 2 | 16.6   | 11     | 17.1   | 20.1   |        |        | 12 a   | 16.5   | 19°    | 3 | 20.4   | 1.4    |        |        |        |        |            |       |
| CDM  | 2008.1.5 HUN               | 2 |        |        | 17.6   | 15.4   | 0.88   |        |        |        |        | 3 | 17.5   | 1.4    | 12.9   | 20.6   | 110.8  | 6.95   | 110.8      | 0.3   |
| RBCM | RBCM.EH2008.011.10221.001  | 2 |        |        | 18.1   |        |        | 15.6 d | 10 d   | 22.5 a | 8°     | 3 | 18.2   | 1.4    |        |        |        |        |            |       |
| RBCM | RBCM.EH2008.011.10322.001  | 2 | 21.9 e | 17.2 e | 0.79 e |        |        | 23.1 e | 19.3 e | 0.84 e |        | 3 | 17.6   | 15.8   |        |        |        |        | 39.5       | 0.3   |
| CDM  | 2008.1.68 HUN              | 2 |        |        |        |        |        | 22.3 e | 18.4 e | 0.83 e | 12 e   |   | 16.2 d | 1.6    |        |        |        |        | 73.2       |       |
| RBCM | RBCM.EH2008.011.10305.001  | 2 |        |        |        |        |        | 35.2 e | 30.1 e | 0.86   |        |   |        |        |        |        |        |        | 48.5       | 0.4   |
| RBCM | RBCM.EH2008.011.10323.001  | 3 |        |        | 33 e   |        |        |        |        |        |        | 3 |        |        |        |        |        |        | 71.9 d     |       |
| RBCM | RBCM.EH2008.011.106039.001 | 3 | 32 d   |        | 15 d   | 33.5 d |        | 33.5 d | 15 d   | 53 e   | 17° d  | 3 | 33 d   | 1.7    |        |        |        |        | 109.8 d    | 0.7   |
| GSC  | GSC 10065                  | 3 | 33.5 e | 14 e   | 37 e   |        |        | 37.5   | 13     | 39.1 e | 11°    |   | 35.3 d | 2.4    |        | 32 a   | 42.2   | 249.3  | 4.09 e     | 280.8 |
| RBCM | RBCM.EH2008.011.10293.001  | 3 | 34.7 d | 30.8 d | 0.89   | 35.2 a | 30.5 e | 0.87 e | 40.1 e | 31.1 e | 0.78 e | 3 | 34.9   | 31.1   |        | 11 a   |        |        | 48.7       | 0.4   |
|      |                            |   |        |        |        |        |        |        |        |        |        | 4 |        |        |        |        |        |        | 59.4       |       |
|      |                            |   |        |        |        |        |        |        |        |        |        |   | 45.2   |        |        | 14 a   |        |        | 36.9       |       |
| RBCM | RBCM.EH2008.011.10287.001  | 3 |        |        | 36 a   |        |        | 37 a   | 12 a   |        |        | 2 | 46.1   | 37.5   | 0.81   | 16 e   |        |        | 16         |       |
| RBCM | RBCM.EH2008.011.10259.001  | 3 |        |        | 42.8   |        |        | 45.9   | 15     | 42.5 a | 21°    |   |        |        |        | 36.4 d | 32.3   | 2.7    | 63         | 0.6   |
| RBCM | RBCM.EH2008.011.00426.001  | 3 |        |        | 43 e   | 36 a   | 0.84 e |        |        |        |        |   |        |        |        |        |        |        | 176        | 0.6   |
| RBCM | RBCM.EH2008.011.10279.001  | 3 | 40 d   |        | 43 d   |        |        |        |        |        |        |   |        |        |        |        |        |        | 94.4       |       |
| RBCM | RBCM.EH2008.011.10244.001  | 3 | 43.5 d |        | 45 d   |        |        |        |        |        | 20° d  |   |        |        |        |        |        |        | 190        | 0.7   |
| RBCM | RBCM.EH2008.011.10263.001  | 3 |        |        | 49.5 a | 41     | 0.83   | 51.5   | 16     |        |        |   |        |        |        |        |        |        | 132.8 d    | 0.6   |
| RBCM | RBCM.EH2008.011.10310.001  | 4 |        |        | 73.1   |        |        |        |        |        |        |   |        |        |        |        |        |        | 158        | 0.4   |
| RBCM | RBCM.EH2008.011.10300.001  | 4 |        |        | 74.5 a |        |        | 80 a   | 11 a   |        |        |   |        |        |        |        |        |        | 168.3      | 0.7   |
| RBCM | RBCM.EH2008.011.10245.001  | 4 |        |        | 72 a   |        |        |        |        |        |        |   |        |        |        |        |        |        | 326        |       |
| CDM  | 2008.1.67 HUN              | 4 |        |        | 82 e   | 64 a   |        | 83 e   | 11 e   |        |        |   |        |        |        |        |        |        | 135.8 d    | 0.5   |
| RBCM | RBCM.EH2008.011.10253.001  | 4 |        |        | 83 a   |        |        |        |        |        |        | 5 |        |        |        | 13 d   |        |        | 280        | 1.2   |
| RBCM | RBCM.EH2008.011.10312.001  | 4 |        |        | 89.3   |        |        | 90 a   | 13 a   |        |        | 5 |        |        |        |        |        |        | 111.5 d    | 0.6   |
| RBCM | RBCM.EH2008.011.10295.001  |   |        |        |        |        |        |        |        |        |        | 2 | 7.4    |        |        | 13 e   |        |        | 255        | 0.7   |
|      |                            |   |        |        |        |        |        |        |        |        |        |   | 10.4 d |        |        | 14 d   |        |        | 23.7 d     |       |
| RBCM | RBCM.EH2008.011.10278.001  |   |        |        |        |        |        |        |        |        |        | 2 | 7.7    |        |        | 10     |        |        |            |       |
| CDM  | 2008.1.29 HUN              |   |        |        |        |        |        |        |        |        |        | 2 | 9      | 7.8    | 0.87   | 12     |        |        | 59.3 ±25.7 | 0.4   |
|      |                            |   |        |        |        |        |        |        |        |        |        |   | 10     | 9.1    | 0.91   | 11     |        |        | 53.7       | 0.2   |
|      |                            |   |        |        |        |        |        |        |        |        |        |   | 10.9   | 9.6    | 0.88   | 10     |        |        |            |       |
| RBCM | RBCM.EH2008.011.10332.001  |   |        |        |        |        |        |        |        |        |        | 2 | 10     | 9.2    | 0.92   | 12     |        |        | 14.1       | 0.2   |
| RBCM | RBCM.EH2008.011.10258.001  |   |        |        |        |        |        |        |        |        |        | 2 | 11.6 d |        |        | 9 e    |        |        | 39.9       |       |
| RBCM | RBCM.EH2008.011.10311.001  |   |        |        |        |        |        |        |        |        |        | 2 | 11.8 d |        |        | 8 d    |        |        | 67.6 d     |       |
| RBCM | RBCM.EH2008.011.10289.001  |   |        |        |        |        |        |        |        |        |        | 2 | 14.6 a |        |        | 12 a   |        |        | 35.6 a     |       |
| RBCM | RBCM.EH2008.011.10230.001  |   |        |        |        |        |        |        |        |        |        | 3 |        |        |        |        | 21 e   | 3      | 45         |       |
| RBCM | RBCM.EH2008.011.10242.001  |   |        |        |        |        |        |        |        |        |        | 3 | 21.1   | 18.8   | 0.89   | 13     | 23     | 19.4 e | 2.3        | 23.2  |
|      |                            |   |        |        |        |        |        |        |        |        |        |   | 23.7   | 20 e   | 0.84   | 12     | 20.7 e | 16.4 e | 1.8        | 30.4  |
|      |                            |   |        |        |        |        |        |        |        |        |        |   |        |        |        |        | 27.6   | 24.2 e | 1.9        | 111.8 |
|      |                            |   |        |        |        |        |        |        |        |        |        |   |        |        |        |        |        |        | 6.44       | 186.8 |
|      |                            |   |        |        |        |        |        |        |        |        |        |   |        |        |        |        |        |        |            | 0.4   |
| RBCM | RBCM.EH2008.011.10317.001  |   |        |        |        |        |        |        |        |        |        | 3 | 22.5   | 17.5 d | 0.78 d | 11 e   |        |        | 168        |       |
| RBCM | RBCM.EH2008.011.10285.001  |   |        |        |        |        |        |        |        |        |        | 3 | 23.5 a | 20.1 e | 0.86   | 13 a   |        |        | 30 d       |       |
| CDM  | 2012.23.10 SIB             |   |        |        |        |        |        |        |        |        |        | 3 | 28.8 d |        |        | 15 d   |        |        | 31         | 0.3   |
| RBCM | RBCM.EH2008.011.10325.001  |   |        |        |        |        |        |        |        |        |        | 3 | 30     | 26.3   | 0.88   | 15     |        |        | 68         | 0.4   |
| RBCM | RBCM.EH2008.011.10296.001  |   |        |        |        |        |        |        |        |        |        | 3 | 31.8 e | 27 d   | 0.85 d | 11 e   |        |        | 64 ±11     | 0.5   |
| RBCM | RBCM.EH2008.011.10320.001  |   |        |        |        |        |        |        |        |        |        | 3 | 31.8 a | 28.6 a | .90    |        |        |        | 54.6 d     |       |
| RBCM | RBCM.EH2008.011.10271.001  |   |        |        |        |        |        |        |        |        |        | 3 |        |        |        |        | 32 e   | 1.9    | 67 d       | 0.6   |
| RBCM | RBCM.EH2008.011.10309.001  |   |        |        |        |        |        |        |        |        |        | 3 | 32 d   |        |        | 13 d   |        |        | 105 d      |       |
| CDM  | 2008.1.4 HUN               |   |        |        |        |        |        |        |        |        |        | 3 | 34.3   | 30     | 0.87   | 15 a   |        |        | 58.7       | 0.4   |
| RBCM | RBCM.EH2008.011.10241.001  |   |        |        |        |        |        |        |        |        |        | 3 | 34.5 e |        |        | 10 e   |        |        | 120 d      | 0.5   |
| RBCM | RBCM.EH2008.011.10243.001  |   |        |        |        |        |        |        |        |        |        | 3 | 37.5 d |        |        | 13 d   |        |        | 183.9 d    | 0.5   |
| RBCM | RBCM.EH2008.011.10321.001  |   |        |        |        |        |        |        |        |        |        | 3 | 37.7   | 31.9   | 0.85   | 13 d   |        |        | 48         | 0.5   |
| CDM  | 2008.1.69 HUN              |   |        |        |        |        |        |        |        |        |        | 4 | 38 e   | 32 e   | 0.83 e | 15 e   | 32 e   | 29 e   | 2.1        | 79    |
|      |                            |   |        |        |        |        |        |        |        |        |        |   |        |        |        |        | 40.5 a | 33.4 a | 2.6        | 0.5   |
| RBCM | RBCM.EH2008.011.10319.001  |   |        |        |        |        |        |        |        |        |        | 3 | 38 a   |        |        | 11 a   |        |        | 63.9 d     | 0.5   |
| RBCM | RBCM.EH2008.011.10326.001  |   |        |        |        |        |        |        |        |        |        | 3 | 38.7   | 31.7 a | 0.82 a | 17 a   |        |        | 23.4       |       |
| RBCM | RBCM.EH2016.007.0005.001   |   |        |        |        |        |        |        |        |        |        | 3 | 38.8   | 33.1   | 0.85   | 13 a   |        |        | 30         | 0.4   |
| CDM  | 2008.1.12 HUN              |   |        |        |        |        |        |        |        |        |        | 3 | 39     |        |        | 13 a   |        |        | 143.7 d    | 0.5   |
| RBCM | RBCM.EH2008.011.10327.001  |   |        |        |        |        |        |        |        |        |        | 3 | 39.3   | 35.5   | 0.90   | 13     | 30     | 34.9   | 1.9        | 73    |
| CDM  | 993.111.2                  |   |        |        |        |        |        |        |        |        |        | 3 | 39.5   | 32.8   | 0.83   | 13     | 36.9   | 30.4   | 2.7        | 36.7  |
|      |                            |   |        |        |        |        |        |        |        |        |        |   |        |        |        |        | 39.7   | 33 e   | 2.6        | 39.8  |
|      |                            |   |        |        |        |        |        |        |        |        |        |   |        |        |        |        |        |        | 48.7       | 12.7  |
|      |                            |   |        |        |        |        |        |        |        |        |        |   |        |        |        |        |        |        | 48.7       | 0.5   |
| RBCM | RBCM.EH2008.011.10307.001  |   |        |        |        |        |        |        |        |        |        | 3 | 41 d   |        |        | 15 a   |        |        | 106 d      |       |
| RBCM | RBCM.EH2008.011.10254.001  |   |        |        |        |        |        |        |        |        |        | 3 | 41.1 e |        |        | 14 a   |        |        | 110 ±10    | 0.6   |
| RBCM | RBCM.EH2004.012.0095.001   |   |        |        |        |        |        |        |        |        |        | 4 | 43 a   |        |        | 12 a   |        |        | 67.5       | 0.4   |

Table 1.3 Continued

|      |                           |   |        |        |        |      |      |      |     |      |      |       |      |  |  |  |  |  |                |     |
|------|---------------------------|---|--------|--------|--------|------|------|------|-----|------|------|-------|------|--|--|--|--|--|----------------|-----|
| RBCM | RBCM.EH2008.011.10282.001 | 4 | 43.3   | 37.5   | 0.87   | 14   |      |      |     |      |      |       |      |  |  |  |  |  | 116 d          | 0.5 |
| RBCM | RBCM.EH2008.011.10670.001 | 4 | 44.2 a | 36.4 d | 0.82 d |      |      |      |     |      |      |       |      |  |  |  |  |  | 40.6 d         | 0.6 |
| RBCM | RBCM.EH2008.011.06043.001 | 4 | 44.4   | 36.5   | 0.82   | 16   | 44.4 | 37.5 | 1.6 |      |      |       |      |  |  |  |  |  | 178            | 0.5 |
| RBCM | RBCM.EH2008.011.10246.001 | 4 | 45.6   | 40.8 a | 0.89 a | 17 a |      |      |     |      |      |       |      |  |  |  |  |  | 92             | 0.5 |
| CDM  | 2008.1.23 HUN             | 4 | 46.7   | 39.1   | 0.84   | 16 a |      |      |     |      |      |       |      |  |  |  |  |  | 304.3 d        | 0.5 |
| RBCM | RBCM.EH2008.011.10269.001 | 4 | 46.7 d | 37 d   | 0.79 d | 13 d |      |      |     |      |      |       |      |  |  |  |  |  | 57.7 d         | 0.6 |
| GSC  | GSC 10064                 | 4 | 47.2   | 39.2   | 0.83   | 14   | 39.2 | 47.3 | 1.7 | 47.3 | 57.5 | 201.8 | 5.05 |  |  |  |  |  | 280            | 0.5 |
|      |                           |   | 55.6   | 45.8   | 0.82   | 13   | 55   |      | 1.7 |      |      |       |      |  |  |  |  |  |                |     |
| CDM  | 2008.1.70 HUN             | 4 | 48     | 39.4   | 0.82   | 13   |      |      |     | 45.6 | 60.8 | 382   | 7.9  |  |  |  |  |  | 450            | 0.8 |
|      |                           |   | 55     | 47.1   | 0.85   | 12   |      |      |     |      |      |       |      |  |  |  |  |  |                |     |
|      |                           |   | 58     | 51     | 0.88   | 11   |      |      |     |      |      |       |      |  |  |  |  |  |                |     |
|      |                           |   | 59     |        |        | 10   |      |      |     |      |      |       |      |  |  |  |  |  |                |     |
|      |                           |   | 60     | 51     | 0.85   |      |      |      |     |      |      |       |      |  |  |  |  |  |                |     |
| RBCM | RBCM.EH2008.011.10260.001 | 4 | 47.8   | 37.2 a | 0.78 a | 14   | 38 e |      | 2.2 |      |      |       |      |  |  |  |  |  | 114 d          | 0.6 |
|      |                           |   | 51.7   | 42.7   | 0.83   | 12   | 54 a |      | 2.3 |      |      |       |      |  |  |  |  |  | 108            | 0.5 |
| RBCM | RBCM.EH2008.011.10315.001 | 4 | 48.1   | 39.7   | 0.83   | 15 a |      |      |     |      |      |       |      |  |  |  |  |  | 270 d          | 0.7 |
|      |                           |   | 75     |        |        | 16   |      |      |     |      |      |       |      |  |  |  |  |  |                |     |
| RBCM | RBCM.EH2008.011.10313.001 | 4 | 48.9 a |        |        | 16 a |      |      |     |      |      |       |      |  |  |  |  |  | 193            | 0.7 |
| RBCM | RBCM.EH2008.011.10281.001 | 4 | 49 a   |        |        | 11 a |      |      |     |      |      |       |      |  |  |  |  |  | 47             |     |
| RBCM | RBCM.EH2008.011.10308.001 | 4 | 49 a   | 46 a   | 0.86 a | 15 a | 54 a |      | 2.3 |      |      |       |      |  |  |  |  |  | 111 d          | 0.5 |
|      |                           |   |        |        |        |      | 38 e |      | 2.2 |      |      |       |      |  |  |  |  |  | 216 d          | 0.6 |
| RBCM | RBCM.EH2008.011.10264.001 | 4 | 50     | 40 d   | 0.80   | 15 a |      |      |     |      |      |       |      |  |  |  |  |  | 77.5 d         |     |
| RBCM | RBCM.EH2004.012.0102.001  | 4 | 50 d   |        |        | 12 d |      |      |     |      |      |       |      |  |  |  |  |  | 33.3           | 0.5 |
| CDM  | 2008.1.65 HUN             | 4 | 50.3   | 40     | 0.8    | 15   |      |      |     |      |      |       |      |  |  |  |  |  | 70.1           |     |
| RBCM | RBCM.EH2004.012.0093.001  | 4 | 50.4   | 37.8   | 0.75   | 13   |      |      |     |      |      |       |      |  |  |  |  |  | 58             | 0.4 |
| RBCM | RBCM.EH2008.011.10274.001 | 4 | 51     | 45 a   | 0.88 a | 16 a |      |      |     |      |      |       |      |  |  |  |  |  | 38.9 d         | 0.6 |
| CDM  | 2008.1.72 HUN             | 4 | 51.7   | 43.8   | 0.85   | 12 a |      |      |     |      |      |       |      |  |  |  |  |  | 39.4 + 112.8 d | 0.7 |
| CDM  | 2008.1.30 HUN             | 4 | 53     |        |        | 15 a | 50   |      | 2.6 |      |      |       |      |  |  |  |  |  | 189            | 0.5 |
| RBCM | RBCM.EH2008.011.10270.001 | 4 | 53.4   | 46 d   | 0.86 d | 15   |      |      |     |      |      |       |      |  |  |  |  |  | 69             | 0.6 |
| RBCM | RBCM.EH2008.011.10248.001 | 4 | 54 a   |        |        | 11 d |      |      |     |      |      |       |      |  |  |  |  |  | 63 d           | 0.7 |
| RBCM | RBCM.EH2008.011.10304.001 | 4 | 56 a   |        |        | 17 a |      |      |     |      |      |       |      |  |  |  |  |  | 190 d          | 0.7 |
|      |                           |   | 59 a   |        |        | 15 a |      |      |     |      |      |       |      |  |  |  |  |  |                |     |
| RBCM | RBCM.EH2008.011.10303.001 | 4 | 55 a   |        |        | 12 a |      |      |     |      |      |       |      |  |  |  |  |  | 110.5 d        | 0.6 |
| CDM  | 998.1.508 COP             | 4 | 56 d   | 48 d   | 0.86 d | 16 d | 56 d | 48 d | 2.5 |      |      |       |      |  |  |  |  |  | 178            | 0.8 |
| RBCM | RBCM.EH2008.011.10284.001 | 4 | 56.4   | 47.5   | 0.84   | 12   |      |      |     |      |      |       |      |  |  |  |  |  | 70.5           | 0.6 |
| RBCM | RBCM.EH2008.011.10266.001 | 4 | 56.5   | 48.6   | 0.86   | 13 a |      |      |     |      |      |       |      |  |  |  |  |  | 29.6           | 0.5 |
| RBCM | RBCM.EH2008.011.10247.001 | 4 | 57 a   |        |        | 16 a | 60 e | 54 a | 3   |      |      |       |      |  |  |  |  |  | 140            |     |
| RBCM | RBCM.EH2008.011.10255.001 | 4 | 58 a   |        |        | 14 a |      |      |     |      |      |       |      |  |  |  |  |  | 96 d           | 0.6 |
| RBCM | RBCM.EH2008.011.10280.001 | 4 | 59.2   | 50 d   | 0.84 d | 14   |      |      |     |      |      |       |      |  |  |  |  |  | 144            | 0.5 |
| RBCM | RBCM.EH2016.006.0005.001  | 4 | 60 d   |        |        | 12 d |      |      |     |      |      |       |      |  |  |  |  |  | 183            | 0.6 |
| RBCM | RBCM.EH2008.011.10328.001 | 4 | 61.6   | 50 d   | 0.81   | 14   |      |      |     |      |      |       |      |  |  |  |  |  | 150 ±10        | 0.7 |
| CDM  | 996.219.1                 | 5 | 70 e   |        |        | 12 e |      |      |     |      |      |       |      |  |  |  |  |  | 92.3           |     |
| RBCM | RBCM.EH2008.011.10291.001 | 5 | 70 d   |        |        | 17 e |      |      |     |      |      |       |      |  |  |  |  |  | 209 d          | 0.6 |
| RBCM | RBCM.EH2008.011.10256.001 | 5 | 72 a   |        |        | 10 a |      |      |     |      |      |       |      |  |  |  |  |  | 68 d           |     |
| RBCM | RBCM.EH2008.011.10314.001 | 5 | 72 a   |        |        | 10 d |      |      |     |      |      |       |      |  |  |  |  |  | 63.5 d         | 0.4 |
| RBCM | RBCM.EH2004.012.0104.001  | 5 | 75 a   |        |        | 13 a |      |      |     |      |      |       |      |  |  |  |  |  | 153            |     |
| RBCM | RBCM.EH2004.012.0106.001  | 5 | 79 a   |        |        | 14 a |      |      |     |      |      |       |      |  |  |  |  |  | 112            | 0.6 |
| RBCM | RBCM.EH2008.011.10297.001 | 5 | 79 a   |        |        | 15 a |      |      |     |      |      |       |      |  |  |  |  |  | 67.8 d         |     |
| RBCM | RBCM.EH2008.011.10338.001 | 5 | 82 a   |        |        | 12 d |      |      |     |      |      |       |      |  |  |  |  |  | 190 d          | 0.8 |
| RBCM | RBCM.EH2008.011.10283.001 | 5 | 86 a   |        |        | 12 e |      |      |     |      |      |       |      |  |  |  |  |  | 145            | 0.7 |
| RBCM | RBCM.EH2008.011.10306.001 | 5 | 86 a   |        |        | 14 e |      |      |     |      |      |       |      |  |  |  |  |  | 189            | 0.8 |
| RBCM | RBCM.EH2008.011.10257.001 | 5 | 92 a   |        |        | 13 a |      |      |     |      |      |       |      |  |  |  |  |  | 142            |     |
| RBCM | RBCM.EH2008.011.10298.001 | 5 | 92 a   |        |        | 17 e |      |      |     |      |      |       |      |  |  |  |  |  | 258 d          | 0.7 |
| RBCM | RBCM.EH2008.011.10668.001 | 5 | 97 a   |        |        | 11 a |      |      |     |      |      |       |      |  |  |  |  |  | 80 d           |     |
| RBCM | RBCM.EH2016.005.0029.001  | 3 | 19.6   | 18     | 0.92   | 12   | 18.1 | 16.6 | 2.1 |      |      |       |      |  |  |  |  |  | 71             | 0.3 |
|      |                           | 4 | 46 d   |        |        | 16 e | 42 d |      | 2.1 |      |      |       |      |  |  |  |  |  | 225            | 0.8 |
| RBCM | RBCM.EH2008.011.10302.001 | 5 | 102 a  |        |        | 12 a |      |      |     |      |      |       |      |  |  |  |  |  | 103 d          | 0.7 |

**Table 1.4**

Table 1.4

| <i>D. (Diplomoceras) cf. cylindraceum</i> (Defrance, 1816) |                          |             |                         |      |      |    |               |    | Tube Dimensions |                 |                 |      |        |                |     |
|------------------------------------------------------------|--------------------------|-------------|-------------------------|------|------|----|---------------|----|-----------------|-----------------|-----------------|------|--------|----------------|-----|
|                                                            |                          |             | Independent Limb Points |      |      |    | Constrictions |    | Expansion Rate  |                 |                 |      | Length | Shell          |     |
| Repository                                                 | Accession No.            | In-text No. | Wh                      | Wb   | Wb/h | Ci | Wh            | Wb | Fb              | WH <sub>1</sub> | WH <sub>2</sub> | L    | Xr     | L              | T   |
| RBCM                                                       | RBCM.EH2008.01.10238.001 | RBCM.21     | 23.6                    | 22.2 | 0.94 | 11 |               |    |                 | 20.7            | 26.6            | 46.5 | 12.69  | 105.2 + 86.7 d | 0.3 |

Table 1.5

| <i>E. (Exiteloceras) densicostatum</i> sp. nov. |                           |             | Whorls |                    |      |        |        |               |        |     | Tube Dimensions |                 |        |         |                |       |
|-------------------------------------------------|---------------------------|-------------|--------|--------------------|------|--------|--------|---------------|--------|-----|-----------------|-----------------|--------|---------|----------------|-------|
| Repository                                      | Accession No.             | In-text No. | Cu     | Independent Points |      |        |        | Constrictions |        |     | Expansion Rate  |                 |        |         | Length         | Shell |
|                                                 |                           |             |        | Wh                 | Wb   | Wb/h   | Ci     | Wh            | Wb     | Fb  | Wh <sub>1</sub> | Wh <sub>2</sub> | L      | Xr      | L              | T     |
| RBCM                                            | RBCM.EH2008.011.00425.001 | RBCM.25     | 29°    | 16                 |      |        | 9      | 5.4           |        |     | 3.3             | 6.9             | 27.4   | 13.14   | 117.4          | 0.3   |
|                                                 |                           |             |        |                    |      |        |        | 12.5          | 8.6 e  | 1   | 11.3            | 17.3            | 49     | 12.24   |                |       |
|                                                 |                           |             |        |                    |      |        |        | 16.5          | 11.2 e | 1.1 |                 |                 |        |         |                |       |
| RBCM                                            | RBCM.EH2015.003.0003.001  | RBCM.26     | 35°    | 19                 | 16 e | 0.89 e | 8      | 21.4 d        |        | 1.5 |                 |                 |        |         | 53.7           | 0.3   |
| RBCM                                            | RBCM.EH2016.005.0017.001  | RBCM.27     | 28°    | 7.7                | 7.1  | 0.92   | 10     | 6.8 a         | 5.8 a  | 1.1 |                 |                 |        |         | 42.5           | 0.1   |
| RBCM                                            | RBCM.EH2015.003.0002.001  | RBCM.28     | 38°    | 10.4               |      |        | 10     | 10.6 d        |        | 0.6 | 24.6 d          | 31.7 d          | 66.6 e | 10.66 e | 108.3 + 78.2 d | 0.3   |
|                                                 |                           |             |        | 30                 |      | 18 e   | 12 d   |               | 0.6    |     |                 |                 |        |         |                |       |
|                                                 |                           |             |        |                    |      |        | 14.6 d |               | 0.6    |     |                 |                 |        |         |                |       |
|                                                 |                           |             |        |                    |      |        | 24.5 d |               | 1      |     |                 |                 |        |         |                |       |
|                                                 |                           |             |        |                    |      |        | 26.3 d |               | 1.1    |     |                 |                 |        |         |                |       |

Table 1.6

| <i>E. (Neancyloceras) aff. bipunctatum</i> (Schlüter, 1872) |                           |             | Whorls             |       |        |        |     |               |     |       | Tube Dimensions |                 |      |       |        |       |  |
|-------------------------------------------------------------|---------------------------|-------------|--------------------|-------|--------|--------|-----|---------------|-----|-------|-----------------|-----------------|------|-------|--------|-------|--|
|                                                             |                           |             | Independent Points |       |        |        |     | Constrictions |     |       | Expansion Rate  |                 |      |       | Length | Shell |  |
| Repository                                                  | Accession No.             | In-text No. | Cu                 | Wh    | Wb     | Wb/h   | Ci  | Wh            | Wb  | Fb    | Wh <sub>1</sub> | Wh <sub>2</sub> | L    | Xr    | L      | T     |  |
| RBCM                                                        | RBCM.EH2008.011.10218.001 | RBCM.29     | 15°                | 5.4   | 4.9    | 0.91   | 5   | 2.7           |     | 0.2   | 4.5             | 5.9             | 14.5 | 9.66  | 43     | 0.2   |  |
| RBCM                                                        | RBCM.EH2008.011.00424.001 | RBCM.30     | 23°                | 13.8  |        |        | 6   | 7.9 a         |     | 1.2   | 13              | 20              | 78.1 | 8.96  | 134    | 0.4   |  |
|                                                             |                           |             |                    | 18.2  |        |        | 7   | 13.7          |     |       |                 |                 |      |       |        |       |  |
|                                                             |                           |             |                    | 19.9  | 18.4 e | 0.92 e | 8   | 15.6          |     | 1.3 a |                 |                 |      |       |        |       |  |
|                                                             |                           |             |                    |       |        |        |     | 18.5          |     | 1.4   |                 |                 |      |       |        |       |  |
|                                                             |                           |             |                    |       |        |        |     | 19.3          |     | 1.4   |                 |                 |      |       |        |       |  |
|                                                             |                           |             |                    |       |        |        |     | 23 a          |     | 1.7   |                 |                 |      |       |        |       |  |
| RBCM                                                        | RBCM.EH2016.009.0022.001  | RBCM.31     | 19°                | 3     | 2.8    | 0.93   | 4   |               |     |       | 3.6             | 5.4             | 15.6 | 11.54 | 27.5   | 0.1   |  |
|                                                             |                           |             |                    | 4.9   | 4.5    | 0.92   | 4   |               |     |       |                 |                 |      |       |        |       |  |
| RBCM                                                        | RBCM.EH2016.009.0004.002  | RBCM.32     | 14°                | 6.3   |        |        | 5   | 4             |     | 0.8   | 4.9             | 6.9             | 21.5 | 9.3   | 26.1   | 0.1   |  |
| RBCM                                                        | RBCM.EH2008.011.10212.001 | RBCM.33     | 12°                | 7.1   |        |        | 6   | 6             |     | 0.5   | 5.5             | 8.1             | 33   | 7.88  | 48.2   | 0.3   |  |
|                                                             |                           |             |                    |       |        |        |     | 7.5           |     | 0.8   |                 |                 |      |       |        |       |  |
| RBCM                                                        | RBCM.EH2008.011.10206.007 |             | 20°                | 6.4   | 5.4 e  | 0.84 e | 5   |               |     |       | 5.3             | 7.3             | 16.6 | 12.05 | 19.3   | 0.2   |  |
| RBCM                                                        | RBCM.EH2008.011.10206.006 |             |                    | 4.5   | 3.9    | 0.87   | 4   |               |     |       |                 |                 |      |       | 13.3   |       |  |
| RBCM                                                        | RBCM.EH2016.009.0019.002  |             |                    | 8.5 a |        |        | 6 a |               | 7.5 | 1     |                 |                 |      |       | 19.7   | 0.2   |  |
| RBCM                                                        | RBCM.EH2016.009.0025.005  |             | 15°                | 5.6   | 5.7    | 1.02   | 4   |               |     |       | 5               | 5.7             | 17   | 4.12  | 17     |       |  |
| RBCM                                                        | RBCM.EH2016.009.0025.006  |             |                    | 5.1   |        |        | 4   |               |     |       |                 |                 |      |       | 9.7    |       |  |

Table 1.5

| <i>Phylloptychoceras horitai</i> Shigeta & Nishimura, 2013 |                           |             | Elbows |                                |       |      |     |                                |       |      |       |                                |      |      |     | Limbs          |       |                         |    |      |     |               | Tube Dimensions |     |                 |                 |      |             |        |   |       |
|------------------------------------------------------------|---------------------------|-------------|--------|--------------------------------|-------|------|-----|--------------------------------|-------|------|-------|--------------------------------|------|------|-----|----------------|-------|-------------------------|----|------|-----|---------------|-----------------|-----|-----------------|-----------------|------|-------------|--------|---|-------|
| Repository                                                 | Accession No.             | In-text No. | Order  | D <sub>1</sub> -V <sub>1</sub> |       |      |     | D <sub>2</sub> -V <sub>2</sub> |       |      |       | D <sub>3</sub> -V <sub>3</sub> |      |      |     | Limb Proximity | Order | Independent Limb Points |    |      |     | Constrictions |                 |     | Expansion Rate  |                 |      |             | Length |   | Shell |
|                                                            |                           |             |        | Wh                             | Wb    | Wb/h | Ci  | Wh                             | Wb    | Wb/h |       | Wh                             | Wb   | Wb/h | Ci  |                |       | Wh                      | Wb | Wb/h | Ci  | Wh            | Wb              | Fb  | Wh <sub>1</sub> | Wh <sub>2</sub> | L    | Xr          | L      | T |       |
| CDM                                                        | 2013.84.1                 |             | 5      | 7.2 a                          |       |      | 3 a | 6.9                            | 8.3   | 1.2  | 8.3   |                                |      |      | 0.4 | 5, 6           |       |                         |    |      |     |               |                 | 7.2 | 8.9             | 30.6            | 5.56 | 38.9        | 0.2    |   |       |
| RBCM                                                       | RBCM.EH2016.009.0008.001  | RBCM.34     |        |                                |       |      |     |                                |       |      |       |                                |      |      |     | 1              |       |                         |    |      |     |               |                 | 0.3 | 0.5             | 10              | 2    | 10.7        |        |   |       |
| RBCM                                                       | RBCM.EH2016.005.0001.002  | RBCM.35     | 1      | 0.8                            |       |      |     | 0.9                            |       |      | 1     |                                |      |      |     | 1-3            |       |                         |    |      | 1.4 |               | 0.3             | 0.7 | 1.6             | 23.6            | 3.81 | 42.5        |        |   |       |
|                                                            |                           |             | 2      | 1.4                            | 1.8   | 1.29 | 3   | 1.6                            | 1.9   | 1.19 | 1.6 e |                                |      |      |     |                |       |                         |    |      |     |               |                 |     |                 |                 |      |             |        |   |       |
| RBCM                                                       | RBCM.EH2016.009.0005.002  | RBCM.36     | 2      | 1.4                            | 1.7   | 1.21 | 3   | 1.5                            |       |      | 1.7   |                                |      | 4    |     | 2, 3           |       |                         |    |      |     |               |                 |     |                 |                 | 14   |             |        |   |       |
| RBCM                                                       | RBCM.EH2015.003.0013.001  | RBCM.37     | 1      | 0.9                            | 0.8   | 0.89 |     | 0.9                            | 0.8   | 1    | 1     | 1                              | 1    |      |     | 1-3            |       |                         |    |      |     |               |                 | 1   | 2.5             | 33.8            | 4.44 | 39.4        |        |   |       |
|                                                            |                           |             | 2      | 1.4                            | 1.4   | 1    |     | 1.6                            | 1.6   | 1    | 1.7   |                                |      |      |     |                |       |                         |    |      |     |               |                 |     |                 |                 |      |             |        |   |       |
| RBCM                                                       | RBCM.EH2008.011.10202.001 | RBCM.38     | 2      | 1.4                            | 1.7   | 1.21 | 2   | 1.4                            | 1.7   | 1.21 | 1.7   |                                |      | 3    | 0   | 2, 3           |       |                         |    |      |     |               |                 | 1.1 | 1.4             | 12              | 2.5  | 24.4        |        |   |       |
| RBCM                                                       | RBCM.EH2016.005.0001.001  | RBCM.39     | 3      | 2                              |       |      | 3   | 1.9                            | 2.3   | 1.21 |       |                                |      |      | 0.2 | 3, 4           |       |                         |    |      |     |               |                 | 1.8 | 2.3             | 22.6            | 2.21 | 22.6        |        |   |       |
| RBCM                                                       | RBCM.EH2016.009.0006.001  | RBCM.40     | 3      | 2.8                            | 2.9   | 1.04 | 4   | 2.7                            | 3.2   | 1.19 | 3.2   | 3.3                            | 1.03 |      | 0.2 | 3, 4           |       |                         |    |      |     |               |                 |     |                 |                 | 7.4  |             |        |   |       |
| RBCM                                                       | RBCM.EH2015.003.0008.001  | RBCM.41     | 3      | 3.6                            |       |      |     | 3.3                            | 3.7   | 1.12 | 3.6   |                                |      |      |     | 3, 4           |       |                         |    |      |     |               |                 | 3.9 | 4               | 14.5            | 0.69 | 23          |        |   |       |
| RBCM                                                       | RBCM.EH2016.009.0018.001  | RBCM.42     | 3      |                                |       |      |     | 2.8                            | 2.8 d | 1 d  | 2.9   | 2.9                            | 1    |      | 1.1 | 3, 4           |       |                         |    |      | 2.6 | 2.6           | 0.4             | 2.8 | 3               | 16.1            | 1.24 | 16.7        |        |   |       |
| RBCM                                                       | RBCM.EH2015.021.0003.001  | RBCM.43     | 1      |                                |       |      |     | 0.9                            |       |      |       |                                |      |      |     | 1-4            |       |                         |    |      | 1.7 |               | 0.2             | 0.6 | 2.8             | 53              | 4.15 | 55.1        | 0.2    |   |       |
|                                                            |                           |             | 2      | 1.3                            |       |      | 2   | 1.5                            | 1.5   | 1    | 1.6   |                                |      |      |     |                |       |                         |    |      | 1.5 |               | 0.1             |     |                 |                 |      |             |        |   |       |
|                                                            |                           |             | 3      | 2.3                            |       |      |     | 2.3                            | 2.4   | 1.04 | 2.7   |                                |      |      | 0.8 |                |       |                         |    |      |     |               |                 |     |                 |                 |      |             |        |   |       |
| RBCM                                                       | RBCM.EH2015.003.0007.001  | RBCM.44     | 1      |                                |       |      |     | 0.8 e                          |       |      |       |                                |      |      |     | 1-4            |       |                         |    |      |     |               |                 | 1.6 | 2.5             | 29.7            | 3.03 | 44.1 + 13 e |        |   |       |
|                                                            |                           |             | 2      |                                |       |      |     | 1.4                            |       |      |       |                                |      |      |     |                |       |                         |    |      |     |               |                 |     |                 |                 |      |             |        |   |       |
|                                                            |                           |             | 3      |                                |       |      |     | 2.1                            |       |      |       |                                |      |      |     |                |       |                         |    |      |     |               |                 |     |                 |                 |      |             |        |   |       |
| RBCM                                                       | RBCM.EH2015.021.0004.001  | RBCM.45     | 1      |                                |       |      |     | 0.9                            |       |      |       |                                |      |      |     | 1-4            |       |                         |    |      | 1.3 | 1.7           | 0.3             | 1.8 | 2.7             | 27.8            | 3.24 | 69.7        | 0.2    |   |       |
|                                                            |                           |             | 2      | 1.7                            | 1.7   | 1    | 2   | 1.5                            | 1.7   | 1.13 | 1.3   | 1.7                            | 1.3  | 2    |     |                |       |                         |    |      |     |               |                 |     |                 |                 |      |             |        |   |       |
|                                                            |                           |             | 3      | 2.6                            | 2.6   | 1    |     | 2.4                            |       |      | 2.8   | 2.8                            | 1    |      |     |                |       |                         |    |      |     |               |                 |     |                 |                 |      |             |        |   |       |
| RBCM                                                       | RBCM.EH2015.003.0005.001  | RBCM.46     | 4      |                                |       |      |     | 3.8                            | 3.8   | 1    | 4.2   | 4.2 e                          | 1 e  |      |     |                |       |                         |    |      |     |               |                 | 3.3 | 4.2             | 29              | 3.1  | 64.4        |        |   |       |
| RBCM                                                       | RBCM.EH2015.003.0010.001  | RBCM.47     | 5      | 6.7                            | 6.7 e | 1 e  | 4   | 5.6                            | 7.1   | 1.27 | 6.9   |                                |      |      | 0.5 | 5, 6           |       |                         |    |      |     |               |                 | 5.9 | 6.4             | 35.7            | 1.4  | 44.1        |        |   |       |
| RBCM                                                       | RBCM.EH2015.003.0004.001  | RBCM.48     | 5      | 6.4                            | 6.5   | 1.02 | 4   | 6.4                            | 6.5   | 1.02 | 6.4   |                                |      |      | 0.3 | 5, 6           |       |                         |    |      |     |               |                 | 6.3 | 6.4             | 36.4            | 0.27 | 41.3        |        |   |       |

**Table 1.7 Continued**

[illegible]

**Table 1.8**

[illegible]

**Table 1.8 Continued**

|      |                           |         |     |       |        |   |       |       |        |     |       |        |                       |                     |                   |                        |                               |                                               |                                        |                   |            |             |              |       |       |  |
|------|---------------------------|---------|-----|-------|--------|---|-------|-------|--------|-----|-------|--------|-----------------------|---------------------|-------------------|------------------------|-------------------------------|-----------------------------------------------|----------------------------------------|-------------------|------------|-------------|--------------|-------|-------|--|
| RBCM | RBCM.EH2016.009.0023.001  | RBCM.62 | 5.8 |       |        | 4 | 6.5   | 9     | 1.38   | 8.3 | 10 e  | 4      | 1<br>1<br>1<br>1<br>2 |                     |                   |                        | 3<br>3.2 e<br>4<br>4.8<br>9.7 | 0.3<br>0.3<br>0.5<br>0.6<br>1.2               | 3                                      | 6.5               | 52.3       | 6.69        | 99.4         | 0.2   |       |  |
| RBCM | RBCM.EH2016.009.0019.001  | RBCM.63 | 5.8 | 7.8   | 1.34   | 4 | 6.2   | 8.7   | 1.4    |     |       |        | 1<br>2                | 5.8<br>6.9<br>9.5 a | 5.8<br>8.3<br>1.2 | 1<br>4 a               | 4                             |                                               | 8.3<br>5.6                             | 10.5<br>6.4       | 37<br>12.3 | 5.95<br>6.5 | 24.8         | 0.2 < |       |  |
| RBCM | RBCM.EH2016.009.0004.003  | RBCM.64 | 5.1 | 6.8 a | 1.33 a | 4 | 5.1 a | 6.7 a | 1.31 a | 6.6 | 9.2 a | 1.39 a | 4<br>1                | 4.5<br>4.9<br>5     | 5<br>5.6<br>6.6 a | 1.11<br>1.14<br>1.32 a | 4                             |                                               | 4.4                                    | 5.4               | 31.8       | 3.14        | 9.2<br>66.4  |       |       |  |
| RBCM | RBCM.EH2016.009.0005.001  | RBCM.65 |     |       |        |   |       |       |        |     |       |        | 2<br>1                | 4.5                 | 5.5               | 1.22                   | 4                             | 2.5<br>2.6<br>3.2<br>4.1                      | 0.3<br>0.3<br>0.4                      | 7.4<br>2.9        | 8.5<br>5.4 | 19.3<br>23  | 5.7<br>10.87 | 26.5  | 0.2 < |  |
| RBCM | RBCM.EH2016.009.0025.002  |         |     |       |        |   |       |       |        |     |       |        | 1                     |                     | 4.6               |                        | 4                             | 2.6<br>2.9<br>3.1<br>3.6<br>1.3<br>1.7<br>1.8 | 0.5<br>0.5<br>0.6<br>0.1<br>0.2<br>0.3 | 2.4               | 5          | 32.3        | 8.05         | 32.3  | 0.2   |  |
| RBCM | RBCM.EH2016.009.0025.003  |         |     |       |        |   |       |       |        |     |       |        | 1                     |                     |                   |                        |                               |                                               | 1.3<br>1.7<br>1.8                      | 0.1<br>0.2<br>0.3 | 1.3        | 1.9         | 7.8          | 7.69  | 14.3  |  |
| RBCM | RBCM.EH2016.009.0015.002  |         |     |       |        |   | 6.6 a | 8.7 a | 1.32 a | 6.5 | 9.2 a | 1.42 a | 4                     | 2                   |                   |                        |                               |                                               |                                        |                   |            |             |              | 19    |       |  |
| RBCM | RBCM.EH2008.011.10206.001 |         |     |       |        |   |       |       |        |     |       |        | 1                     |                     |                   |                        |                               | 1<br>1.3<br>1.7<br>2<br>3                     | 0.1 e<br>0.1 e<br>0.4<br>0.4<br>0.3    |                   |            |             |              | 5.5   |       |  |
| RBCM | RBCM.EH2008.011.10210.004 |         |     |       |        |   |       |       |        |     |       |        | 1                     |                     |                   |                        |                               | 2.4<br>3                                      | 0.3<br>0.3                             | 1.6               | 2          | 8.6         | 4.65         | 12.2  |       |  |
| RBCM | RBCM.EH2016.009.0023.002  |         |     |       |        |   |       |       |        |     |       |        | 1                     | 3                   |                   |                        | 4                             | 4.8<br>5.5                                    | 0.7                                    | 2.4<br>3.4        | 5.1        | 18.2        | 6.59         | 18.2  | 0.2 e |  |
| RBCM | RBCM.EH2016.009.0025.001  |         |     |       |        |   |       |       |        |     |       |        | 1                     | 5                   | 5.9               | 1.18                   | 4                             |                                               |                                        | 3.9               | 5.1        | 18.2        | 6.59         | 18.2  | 0.2 e |  |
| RBCM | RBCM.EH2008.011.10204.001 |         |     |       |        |   |       |       |        |     |       |        | 1                     | 3.8 e               | 4.2 e             |                        | 4 e                           |                                               |                                        |                   |            |             |              | 16.7  |       |  |
| RBCM | RBCM.EH2016.009.0015.001  |         |     |       |        |   |       |       |        |     |       |        | 1                     | 4.2                 | 5.2               | 1.23                   | 4                             |                                               |                                        |                   |            |             |              | 25.8  |       |  |
| RBCM | RBCM.EH2016.009.0005.003  |         |     |       |        |   |       |       |        |     |       |        | 1                     | 4.6 e               | 5.6 e             | 1.22                   | 4 e                           |                                               |                                        |                   |            |             |              | 9.9   |       |  |
| RBCM | RBCM.EH2016.009.0004.004  |         |     |       |        |   |       |       |        |     |       |        | 1                     | 4.7 e               |                   |                        | 4 e                           |                                               |                                        |                   |            |             |              | 11.3  |       |  |
| RBCM | RBCM.EH2016.009.0004.005  |         |     |       |        |   |       |       |        |     |       |        | 1                     | 5.3                 | 6.5 d             | 1.23                   | 4                             |                                               |                                        |                   |            |             |              | 11.1  |       |  |
| RBCM | RBCM.EH2016.009.0006.002  |         |     |       |        |   |       |       |        |     |       |        | 1                     | 5.3                 |                   |                        | 4                             |                                               |                                        |                   |            |             |              | 11    |       |  |
| RBCM | RBCM.EH2016.009.0022.002  |         |     |       |        |   |       |       |        |     |       |        | 1                     | 5.9                 |                   |                        | 4                             |                                               |                                        |                   |            |             |              | 15.5  | 0.2   |  |
|      |                           |         |     |       |        |   |       |       |        |     |       |        | 2                     | 8.9                 |                   |                        | 4                             |                                               |                                        |                   |            |             |              | 14.5  | 0.4   |  |

Table 1.9

| <i>Solenoceras cf. reesidei</i> Stephenson, 1941 |                          |             | Elbows                         |    |      |    |                                |    |      |    | Limbs                          |    |      |    |       |                         | Tube Dimensions |    |                 |                 |   |                |     |      |      |        |  |       |
|--------------------------------------------------|--------------------------|-------------|--------------------------------|----|------|----|--------------------------------|----|------|----|--------------------------------|----|------|----|-------|-------------------------|-----------------|----|-----------------|-----------------|---|----------------|-----|------|------|--------|--|-------|
| Repository                                       | Accession No.            | In-text No. | D <sub>1</sub> -V <sub>1</sub> |    |      |    | D <sub>2</sub> -V <sub>2</sub> |    |      |    | D <sub>3</sub> -V <sub>3</sub> |    |      |    | Order | Independent Limb Points |                 |    |                 | Constrictions   |   | Expansion Rate |     |      |      | Length |  | Shell |
|                                                  |                          |             | Wh                             | Wb | Wb/h | Ci | Wh                             | Wb | Wb/h | Ci | Wh                             | Wb | Wb/h | Ci |       | Wh                      | Wb              | Fb | Wh <sub>1</sub> | Wh <sub>2</sub> | L | Xr             | L   | T    |      |        |  |       |
| RBCM                                             | RBCM.EH2015.003.0011.001 | RBCM.66     |                                |    |      |    |                                |    |      |    |                                |    |      | 1  | 3.5   | 3.8 e                   | 1.09 e          | 6  | 3.7 e           | 0.3             |   | 3.4            | 4.4 | 18.2 | 5.49 | 23.3   |  |       |
|                                                  |                          |             |                                |    |      |    |                                |    |      |    |                                |    |      | 2  | 6.8   | 8.2 e                   | 1.21 e          | 7  | 3.9 e           | 0.3             |   |                |     |      |      | 14.3   |  |       |

# Family Nostoceratidae Hyatt, 1894

Table 1.10

| <i>Nostoceras (Didymoceras?) adrotans</i> sp. nov. |                           |             | Limbs & Body Chambers          |        |        |      |                                |        |        |                                |        |        |     |                                |        |                   |                  |                    |    |     |     |
|----------------------------------------------------|---------------------------|-------------|--------------------------------|--------|--------|------|--------------------------------|--------|--------|--------------------------------|--------|--------|-----|--------------------------------|--------|-------------------|------------------|--------------------|----|-----|-----|
|                                                    |                           |             | D <sub>1</sub> -V <sub>1</sub> |        |        |      | D <sub>2</sub> -V <sub>2</sub> |        |        | D <sub>3</sub> -V <sub>3</sub> |        |        |     | Limb Proximity                 |        |                   |                  |                    |    |     |     |
| Repository                                         | Accession No.             | In-text No. | Wh                             | Wb     | Wb/h   | Ci   | Wh                             | Wb     | Wb/h   | Wh                             | Wb     | Wb/h   | Ci  | D <sub>1</sub> -D <sub>3</sub> | -Dp-Dp | Dp-D <sub>2</sub> | P-D <sub>2</sub> | F <sub>2</sub> -Dp | C  | T   |     |
| CDM                                                | 2008.1.102 HUN            |             | 19.5                           | 20.7   | 1.05   | 11   | 21.5                           | 21.4   | 1      |                                |        |        |     |                                |        |                   |                  |                    |    | dx  | 0.7 |
| RBCM                                               | RBCM.EH2016.009.0014.001  | RBCM.67     | 21.8                           |        |        | 9    | 25                             |        |        | 24.3                           |        |        |     | 6                              | 9      | 7.3               | 44.3             | 11.5 d ±2.5        |    | s   | 0.7 |
| RBCM                                               | RBCM.EH2008.011.10666.001 | RBCM.68     | 24.1                           | 22     | 0.91   | 11   | 26                             | 26.8   | 1.03   |                                |        |        |     |                                |        |                   |                  |                    |    |     |     |
| RBCM                                               | RBCM.EH2008.011.10429.001 | RBCM.69     | 25.7                           | 22.4 e | 0.87   | 12   | 26 a                           | 26.8 e | 1.03   | 27                             | 27 e   | 1      | 6   | 5.7                            | 3.7    | 38.9              | 5.8              |                    |    |     | 0.7 |
| RBCM                                               | RBCM.EH2016.009.0020.001  | RBCM.70     | 22.6 a                         | 22 a   | 0.97 a | 10 a | 23.6                           | 25     | 1.06   |                                |        |        |     |                                |        |                   |                  |                    |    |     | 0.5 |
| RBCM                                               | RBCM.EH2008.011.10656.001 | RBCM.71     | 21.9 a                         |        |        | 9 a  | 23.4                           | 23.4 e | 1      | 23.3                           |        |        | 5   | 10.5 a                         | 10.5   | 17.9 a            | 8.4              |                    |    |     | 0.6 |
| RBCM                                               | RBCM.EH2008.011.10655.001 | RBCM.72     | 21.5 d                         | 21.4   | 1      | 10 d | 25.2                           | 25.8   | 1.02   | 23.5 d                         | 21.6 d | 0.92   | 5 d | 3                              | 2.6    | 32.8 e            |                  |                    |    |     | 0.6 |
| RBCM                                               | RBCM.EH2008.011.10210.002 | RBCM.73     |                                |        |        |      | 30.3                           | 30.2   | 1      | 26.9                           | 25 a   | 0.93   | 8   | 8.3 a                          | 7.6    | 41                |                  |                    |    |     | 0.8 |
| RBCM                                               | RBCM.EH2016.009.0004.001  | RBCM.74     |                                |        |        |      | 28.6                           | 26.8 a | .94 a  | 26.7                           | 26.1   | 0.98   | 6   |                                |        |                   |                  |                    |    |     | 0.7 |
| RBCM                                               | RBCM.EH2016.009.0003.001  | RBCM.75     | 26.8                           | 25.4   | 0.95   | 11   | 28.6                           | 29     | 1.01   | 27.6                           | 26.1   | 0.95   | 6   | 6.9 d                          | 4.6 d  | 39.6              |                  |                    |    |     |     |
| RBCM                                               | RBCM.EH2008.011.10667.001 |             |                                | 25.3 a |        |      | 23.8 a                         | 25.8 a | 1.08   | 26 a                           | 26.7 a | 1.03   | 7 a |                                | 7.2    |                   |                  |                    |    | dx  | 0.6 |
| RBCM                                               | RBCM.EH2008.011.10654.001 |             | 25.5                           |        |        | 9    | 26.6                           |        |        | 26                             |        |        | 6   | 5.8                            | 3.8    | 33.6              |                  | 23.6               | dx | 0.6 |     |
| CDM                                                | 2008.1.104 HUN            |             |                                |        |        |      | 24.3 e                         | 23.2 e | 0.95 e | 22 e                           | 21.3 e | 0.97 e | 4 e | 7.8                            |        | 7.7               |                  |                    |    |     | 1   |
| RBCM                                               | RBCM.EH2016.009.0017.001  |             | 24.5 a                         |        |        |      | 26.9                           | 28.2 a | 1.05 a | 26.3 a                         |        |        |     | 5.5 a                          |        |                   |                  | 3.2 d ±0.8         |    |     | 0.7 |
| RBCM                                               | RBCM.EH2016.009.0024.001  |             | 21.8 a                         | 21.6 a | 0.99 a | 8 a  | 24                             | 26     | 1.08   | 22.4                           | 24 a   | 1.07 a | 5   | 8.3                            | 5.8 a  | 36.9              | 13 e ±1          |                    |    |     | 0.5 |
| GSC                                                | GSC 5955                  |             | 23.2                           |        |        | 8    | 23.4                           |        |        | 23.2                           |        |        | 5   | 3.6                            | 4.3    | 38.3              | 7.5              | 20.8               |    |     | 0.4 |
| RBCM                                               | RBCM.EH2008.011.10665.001 |             | 23 d                           | 22.9 d | 1      | 10 d | 25.6 a                         | 23.8 e | 0.93   |                                |        |        |     |                                |        |                   |                  | 20.5 a             |    |     |     |
| RBCM                                               | RBCM.EH2008.011.10664.001 |             | 33 a                           |        |        | 10 a | 34.9                           | 37.6 a | 1.08   |                                |        |        |     |                                |        |                   |                  |                    |    |     | 0.7 |
| RBCM                                               | RBCM.EH2008.011.10658.001 |             | 23.4 e                         | 23.4 e | 1      | 9 e  |                                |        |        |                                |        |        |     |                                |        |                   | 15.5 e           |                    |    |     |     |
| RBCM                                               | RBCM.EH2008.011.10657.001 |             | 23 e                           |        |        | 8 a  |                                |        |        |                                |        |        |     |                                |        |                   |                  |                    |    | s   | 0.4 |
| RBCM                                               | RBCM.EH2016.009.0010.001  |             |                                |        |        |      |                                |        |        | 26.7 a                         |        |        | 5 a |                                |        | 42 e              |                  |                    |    |     | 0.4 |
| RBCM                                               | RBCM.EH2008.011.10661.001 |             |                                |        |        |      |                                |        |        | 26 e                           | 24 e   | 0.92   | 5 d |                                |        |                   |                  |                    |    |     |     |

Table 1.11

| <i>Nostoceras (Nostoceras) hornbyense</i> (Whiteaves, 1895) |  |  | Limbs & Body Chambers          |  |  |  |                                |  |  |  |                                |  |  |  |                |  |  | Helical Whorls |  |  |  |                                |  |  |  |  |  | Tube Dimensions |  |  |  |  |  |  |  |  |  |  |  |  |  |  |  |  |  |  |  |  |  |  |  |  |  |  |  |  |  |  |  |  |  |  |  |  |  |  |  |  |  |  |  |  |  |  |  |  |  |  |  |  |  |  |  |  |  |  |  |  |  |  |  |  |  |  |  |  |  |  |  |  |  |  |  |  |  |  |  |  |  |  |  |  |  |  |  |  |  |  |  |  |  |  |  |  |  |  |  |  |  |  |  |  |  |  |  |  |  |  |  |  |  |  |  |  |  |  |  |  |  |  |  |  |  |  |  |  |  |  |  |  |  |  |  |  |  |  |  |  |  |  |  |  |  |  |  |  |  |  |  |  |  |  |  |  |  |  |  |  |  |  |  |  |  |  |  |  |  |  |  |  |  |  |  |  |  |  |  |  |  |  |  |  |  |  |  |  |  |  |  |  |  |  |  |  |  |  |  |  |  |  |  |  |  |  |  |  |  |  |  |  |  |  |  |  |  |  |  |  |  |  |  |  |  |  |  |  |  |  |  |  |  |  |  |  |  |  |  |  |  |  |  |  |  |  |  |  |  |  |  |  |  |  |  |  |  |  |  |  |  |  |  |  |  |  |  |  |  |  |  |  |  |  |  |  |  |  |  |  |  |  |  |  |  |  |  |  |  |  |  |  |  |  |  |  |  |  |  |  |  |  |  |  |  |  |  |  |  |  |  |  |  |  |  |  |  |  |  |  |  |  |  |  |  |  |  |  |  |  |  |  |  |  |  |  |  |  |  |  |  |  |  |  |  |  |  |  |  |  |  |  |  |  |  |  |  |  |  |  |  |  |  |  |  |  |  |  |  |  |  |  |  |  |  |  |  |  |  |  |  |  |  |  |  |  |  |  |  |  |  |  |  |  |  |  |  |  |  |  |  |  |  |  |  |  |  |  |  |  |  |  |  |  |  |  |  |  |  |  |  |  |  |  |  |  |  |  |  |  |  |  |  |  |  |  |  |  |  |  |  |  |  |  |  |  |  |  |  |  |  |  |  |  |  |  |  |  |  |  |  |  |  |  |  |  |  |  |  |  |  |  |  |  |  |  |  |  |  |  |  |  |  |  |  |  |  |  |  |  |  |  |  |  |  |  |  |  |  |  |  |  |  |  |  |  |  |  |  |  |  |  |  |  |  |  |  |  |  |  |  |  |  |  |  |  |  |  |  |  |  |  |  |  |  |  |  |  |  |  |  |  |  |  |  |  |  |  |  |  |  |  |  |  |  |  |  |  |  |  |  |  |  |  |  |  |  |  |  |  |  |  |  |  |  |  |  |  |  |  |  |  |  |  |  |  |  |  |  |  |  |  |  |  |  |  |  |  |  |  |  |  |  |  |  |  |  |  |  |  |  |  |  |  |  |  |  |  |  |  |  |  |  |  |  |  |  |  |  |  |  |  |  |  |  |  |  |  |  |  |  |  |  |  |  |  |  |  |  |  |  |  |  |  |  |  |  |  |  |  |  |  |  |  |  |  |  |  |  |  |  |  |  |  |  |  |  |  |  |  |  |  |  |  |  |  |  |  |  |  |  |  |  |  |  |  |  |  |  |  |  |  |  |  |  |  |  |  |  |  |  |  |  |  |  |  |  |  |  |  |  |  |  |  |  |  |  |  |  |  |  |  |  |  |  |  |  |  |  |  |  |  |  |  |  |  |  |  |  |  |  |  |  |  |  |  |  |  |  |  |  |  |  |  |  |  |  |  |  |  |  |  |  |  |  |  |  |  |  |  |  |  |  |  |  |  |  |  |  |  |  |  |  |  |  |  |  |  |  |  |  |  |  |  |  |  |  |  |  |  |  |  |  |  |  |  |  |  |  |  |  |  |  |  |  |  |  |  |  |  |  |  |  |  |  |  |  |  |  |  |  |  |  |  |  |  |  |  |  |  |  |  |  |  |  |  |  |  |  |  |  |  |  |  |  |  |  |  |  |  |  |  |  |  |  |  |  |  |  |  |  |  |  |  |  |  |  |  |  |  |  |  |  |  |  |  |  |  |  |  |  |  |  |  |  |  |  |  |  |  |  |  |  |  |  |  |  |  |  |  |  |  |  |  |  |  |  |  |  |  |  |  |  |  |  |  |  |  |  |  |  |  |  |  |  |  |  |  |  |  |  |  |  |  |  |  |  |  |  |  |  |  |  |  |  |  |  |  |  |  |  |  |  |  |  |  |  |  |  |  |  |  |  |  |  |  |  |  |  |  |  |  |  |  |  |  |  |  |  |  |  |  |  |  |  |  |  |  |  |  |  |  |  |  |  |  |  |  |  |  |  |  |  |  |  |  |  |  |  |  |  |  |  |  |  |  |  |  |  |  |  |  |  |  |  |  |  |  |  |  |  |  |  |  |  |  |  |  |  |  |  |  |  |  |  |  |  |  |  |  |  |  |  |  |  |  |  |  |  |  |  |  |  |  |  |  |  |  |  |  |  |  |  |  |  |  |  |  |  |  |  |  |  |  |  |  |  |  |  |  |  |  |  |  |  |  |  |  |  |  |  |  |  |  |  |  |  |  |  |  |  |  |  |  |  |  |  |  |  |  |  |  |  |  |  |  |  |  |  |  |  |  |  |  |  |  |  |  |  |  |  |  |  |  |  |  |  |  |  |  |  |  |  |  |  |  |  |  |  |  |  |  |  |  |  |  |  |  |  |  |  |  |  |  |  |  |  |  |  |  |  |  |  |  |  |  |  |  |  |  |  |  |  |  |  |  |  |  |  |  |  |  |  |  |  |  |  |  |  |  |  |  |  |  |  |  |  |  |  |  |  |  |  |  |  |  |  |  |  |  |  |  |  |  |  |  |  |  |  |  |  |  |  |  |  |  |  |  |  |  |  |  |  |  |  |  |  |  |  |  |  |  |  |  |  |  |  |  |  |  |  |  |  |  |  |  |  |  |  |  |  |  |  |  |  |  |  |  |  |  |  |  |  |  |  |  |  |  |  |  |  |  |  |  |  |  |  |  |  |  |  |  |    |
|-------------------------------------------------------------|--|--|--------------------------------|--|--|--|--------------------------------|--|--|--|--------------------------------|--|--|--|----------------|--|--|----------------|--|--|--|--------------------------------|--|--|--|--|--|-----------------|--|--|--|--|--|--|--|--|--|--|--|--|--|--|--|--|--|--|--|--|--|--|--|--|--|--|--|--|--|--|--|--|--|--|--|--|--|--|--|--|--|--|--|--|--|--|--|--|--|--|--|--|--|--|--|--|--|--|--|--|--|--|--|--|--|--|--|--|--|--|--|--|--|--|--|--|--|--|--|--|--|--|--|--|--|--|--|--|--|--|--|--|--|--|--|--|--|--|--|--|--|--|--|--|--|--|--|--|--|--|--|--|--|--|--|--|--|--|--|--|--|--|--|--|--|--|--|--|--|--|--|--|--|--|--|--|--|--|--|--|--|--|--|--|--|--|--|--|--|--|--|--|--|--|--|--|--|--|--|--|--|--|--|--|--|--|--|--|--|--|--|--|--|--|--|--|--|--|--|--|--|--|--|--|--|--|--|--|--|--|--|--|--|--|--|--|--|--|--|--|--|--|--|--|--|--|--|--|--|--|--|--|--|--|--|--|--|--|--|--|--|--|--|--|--|--|--|--|--|--|--|--|--|--|--|--|--|--|--|--|--|--|--|--|--|--|--|--|--|--|--|--|--|--|--|--|--|--|--|--|--|--|--|--|--|--|--|--|--|--|--|--|--|--|--|--|--|--|--|--|--|--|--|--|--|--|--|--|--|--|--|--|--|--|--|--|--|--|--|--|--|--|--|--|--|--|--|--|--|--|--|--|--|--|--|--|--|--|--|--|--|--|--|--|--|--|--|--|--|--|--|--|--|--|--|--|--|--|--|--|--|--|--|--|--|--|--|--|--|--|--|--|--|--|--|--|--|--|--|--|--|--|--|--|--|--|--|--|--|--|--|--|--|--|--|--|--|--|--|--|--|--|--|--|--|--|--|--|--|--|--|--|--|--|--|--|--|--|--|--|--|--|--|--|--|--|--|--|--|--|--|--|--|--|--|--|--|--|--|--|--|--|--|--|--|--|--|--|--|--|--|--|--|--|--|--|--|--|--|--|--|--|--|--|--|--|--|--|--|--|--|--|--|--|--|--|--|--|--|--|--|--|--|--|--|--|--|--|--|--|--|--|--|--|--|--|--|--|--|--|--|--|--|--|--|--|--|--|--|--|--|--|--|--|--|--|--|--|--|--|--|--|--|--|--|--|--|--|--|--|--|--|--|--|--|--|--|--|--|--|--|--|--|--|--|--|--|--|--|--|--|--|--|--|--|--|--|--|--|--|--|--|--|--|--|--|--|--|--|--|--|--|--|--|--|--|--|--|--|--|--|--|--|--|--|--|--|--|--|--|--|--|--|--|--|--|--|--|--|--|--|--|--|--|--|--|--|--|--|--|--|--|--|--|--|--|--|--|--|--|--|--|--|--|--|--|--|--|--|--|--|--|--|--|--|--|--|--|--|--|--|--|--|--|--|--|--|--|--|--|--|--|--|--|--|--|--|--|--|--|--|--|--|--|--|--|--|--|--|--|--|--|--|--|--|--|--|--|--|--|--|--|--|--|--|--|--|--|--|--|--|--|--|--|--|--|--|--|--|--|--|--|--|--|--|--|--|--|--|--|--|--|--|--|--|--|--|--|--|--|--|--|--|--|--|--|--|--|--|--|--|--|--|--|--|--|--|--|--|--|--|--|--|--|--|--|--|--|--|--|--|--|--|--|--|--|--|--|--|--|--|--|--|--|--|--|--|--|--|--|--|--|--|--|--|--|--|--|--|--|--|--|--|--|--|--|--|--|--|--|--|--|--|--|--|--|--|--|--|--|--|--|--|--|--|--|--|--|--|--|--|--|--|--|--|--|--|--|--|--|--|--|--|--|--|--|--|--|--|--|--|--|--|--|--|--|--|--|--|--|--|--|--|--|--|--|--|--|--|--|--|--|--|--|--|--|--|--|--|--|--|--|--|--|--|--|--|--|--|--|--|--|--|--|--|--|--|--|--|--|--|--|--|--|--|--|--|--|--|--|--|--|--|--|--|--|--|--|--|--|--|--|--|--|--|--|--|--|--|--|--|--|--|--|--|--|--|--|--|--|--|--|--|--|--|--|--|--|--|--|--|--|--|--|--|--|--|--|--|--|--|--|--|--|--|--|--|--|--|--|--|--|--|--|--|--|--|--|--|--|--|--|--|--|--|--|--|--|--|--|--|--|--|--|--|--|--|--|--|--|--|--|--|--|--|--|--|--|--|--|--|--|--|--|--|--|--|--|--|--|--|--|--|--|--|--|--|--|--|--|--|--|--|--|--|--|--|--|--|--|--|--|--|--|--|--|--|--|--|--|--|--|--|--|--|--|--|--|--|--|--|--|--|--|--|--|--|--|--|--|--|--|--|--|--|--|--|--|--|--|--|--|--|--|--|--|--|--|--|--|--|--|--|--|--|--|--|--|--|--|--|--|--|--|--|--|--|--|--|--|--|--|--|--|--|--|--|--|--|--|--|--|--|--|--|--|--|--|--|--|--|--|--|--|--|--|--|--|--|--|--|--|--|--|--|--|--|--|--|--|--|--|--|--|--|--|--|--|--|--|--|--|--|--|--|--|--|--|--|--|--|--|--|--|--|--|--|--|--|--|--|--|--|--|--|--|--|--|--|--|--|--|--|--|--|--|--|--|--|--|--|--|--|--|--|--|--|--|--|--|--|--|--|--|--|--|--|--|--|--|--|--|--|--|--|--|--|--|--|--|--|--|--|--|--|--|--|--|--|--|--|--|--|--|--|--|--|--|--|--|--|--|--|--|--|--|--|--|--|--|--|--|--|--|--|--|--|--|--|--|--|--|--|--|--|--|--|--|--|--|--|--|--|--|--|--|--|--|--|--|--|--|--|--|--|--|--|--|--|--|--|--|--|--|--|--|--|--|--|--|--|--|--|--|--|--|--|--|--|--|--|--|--|--|--|--|--|--|--|--|--|--|--|--|--|--|--|--|--|--|--|--|--|--|--|--|--|--|--|--|--|--|--|--|--|--|--|--|--|--|--|--|--|--|--|--|--|--|--|--|--|--|----|
|                                                             |  |  | D <sub>1</sub> -V <sub>1</sub> |  |  |  | D <sub>2</sub> -V <sub>2</sub> |  |  |  | D <sub>3</sub> -V <sub>3</sub> |  |  |  | Limb Proximity |  |  |                |  |  |  | F <sub>1</sub> -F <sub>2</sub> |  |  |  |  |  |                 |  |  |  |  |  |  |  |  |  |  |  |  |  |  |  |  |  |  |  |  |  |  |  |  |  |  |  |  |  |  |  |  |  |  |  |  |  |  |  |  |  |  |  |  |  |  |  |  |  |  |  |  |  |  |  |  |  |  |  |  |  |  |  |  |  |  |  |  |  |  |  |  |  |  |  |  |  |  |  |  |  |  |  |  |  |  |  |  |  |  |  |  |  |  |  |  |  |  |  |  |  |  |  |  |  |  |  |  |  |  |  |  |  |  |  |  |  |  |  |  |  |  |  |  |  |  |  |  |  |  |  |  |  |  |  |  |  |  |  |  |  |  |  |  |  |  |  |  |  |  |  |  |  |  |  |  |  |  |  |  |  |  |  |  |  |  |  |  |  |  |  |  |  |  |  |  |  |  |  |  |  |  |  |  |  |  |  |  |  |  |  |  |  |  |  |  |  |  |  |  |  |  |  |  |  |  |  |  |  |  |  |  |  |  |  |  |  |  |  |  |  |  |  |  |  |  |  |  |  |  |  |  |  |  |  |  |  |  |  |  |  |  |  |  |  |  |  |  |  |  |  |  |  |  |  |  |  |  |  |  |  |  |  |  |  |  |  |  |  |  |  |  |  |  |  |  |  |  |  |  |  |  |  |  |  |  |  |  |  |  |  |  |  |  |  |  |  |  |  |  |  |  |  |  |  |  |  |  |  |  |  |  |  |  |  |  |  |  |  |  |  |  |  |  |  |  |  |  |  |  |  |  |  |  |  |  |  |  |  |  |  |  |  |  |  |  |  |  |  |  |  |  |  |  |  |  |  |  |  |  |  |  |  |  |  |  |  |  |  |  |  |  |  |  |  |  |  |  |  |  |  |  |  |  |  |  |  |  |  |  |  |  |  |  |  |  |  |  |  |  |  |  |  |  |  |  |  |  |  |  |  |  |  |  |  |  |  |  |  |  |  |  |  |  |  |  |  |  |  |  |  |  |  |  |  |  |  |  |  |  |  |  |  |  |  |  |  |  |  |  |  |  |  |  |  |  |  |  |  |  |  |  |  |  |  |  |  |  |  |  |  |  |  |  |  |  |  |  |  |  |  |  |  |  |  |  |  |  |  |  |  |  |  |  |  |  |  |  |  |  |  |  |  |  |  |  |  |  |  |  |  |  |  |  |  |  |  |  |  |  |  |  |  |  |  |  |  |  |  |  |  |  |  |  |  |  |  |  |  |  |  |  |  |  |  |  |  |  |  |  |  |  |  |  |  |  |  |  |  |  |  |  |  |  |  |  |  |  |  |  |  |  |  |  |  |  |  |  |  |  |  |  |  |  |  |  |  |  |  |  |  |  |  |  |  |  |  |  |  |  |  |  |  |  |  |  |  |  |  |  |  |  |  |  |  |  |  |  |  |  |  |  |  |  |  |  |  |  |  |  |  |  |  |  |  |  |  |  |  |  |  |  |  |  |  |  |  |  |  |  |  |  |  |  |  |  |  |  |  |  |  |  |  |  |  |  |  |  |  |  |  |  |  |  |  |  |  |  |  |  |  |  |  |  |  |  |  |  |  |  |  |  |  |  |  |  |  |  |  |  |  |  |  |  |  |  |  |  |  |  |  |  |  |  |  |  |  |  |  |  |  |  |  |  |  |  |  |  |  |  |  |  |  |  |  |  |  |  |  |  |  |  |  |  |  |  |  |  |  |  |  |  |  |  |  |  |  |  |  |  |  |  |  |  |  |  |  |  |  |  |  |  |  |  |  |  |  |  |  |  |  |  |  |  |  |  |  |  |  |  |  |  |  |  |  |  |  |  |  |  |  |  |  |  |  |  |  |  |  |  |  |  |  |  |  |  |  |  |  |  |  |  |  |  |  |  |  |  |  |  |  |  |  |  |  |  |  |  |  |  |  |  |  |  |  |  |  |  |  |  |  |  |  |  |  |  |  |  |  |  |  |  |  |  |  |  |  |  |  |  |  |  |  |  |  |  |  |  |  |  |  |  |  |  |  |  |  |  |  |  |  |  |  |  |  |  |  |  |  |  |  |  |  |  |  |  |  |  |  |  |  |  |  |  |  |  |  |  |  |  |  |  |  |  |  |  |  |  |  |  |  |  |  |  |  |  |  |  |  |  |  |  |  |  |  |  |  |  |  |  |  |  |  |  |  |  |  |  |  |  |  |  |  |  |  |  |  |  |  |  |  |  |  |  |  |  |  |  |  |  |  |  |  |  |  |  |  |  |  |  |  |  |  |  |  |  |  |  |  |  |  |  |  |  |  |  |  |  |  |  |  |  |  |  |  |  |  |  |  |  |  |  |  |  |  |  |  |  |  |  |  |  |  |  |  |  |  |  |  |  |  |  |  |  |  |  |  |  |  |  |  |  |  |  |  |  |  |  |  |  |  |  |  |  |  |  |  |  |  |  |  |  |  |  |  |  |  |  |  |  |  |  |  |  |  |  |  |  |  |  |  |  |  |  |  |  |  |  |  |  |  |  |  |  |  |  |  |  |  |  |  |  |  |  |  |  |  |  |  |  |  |  |  |  |  |  |  |  |  |  |  |  |  |  |  |  |  |  |  |  |  |  |  |  |  |  |  |  |  |  |  |  |  |  |  |  |  |  |  |  |  |  |  |  |  |  |  |  |  |  |  |  |  |  |  |  |  |  |  |  |  |  |  |  |  |  |  |  |  |  |  |  |  |  |  |  |  |  |  |  |  |  |  |  |  |  |  |  |  |  |  |  |  |  |  |  |  |  |  |  |  |  |  |  |  |  |  |  |  |  |  |  |  |  |  |  |  |  |  |  |  |  |  |  |  |  |  |  |  |  |  |  |  |  |  |  |  |  |  |  |  |  |  |  |  |  |  |  |  |  |  |  |  |  |  |  |  |  |  |  |  |  |  |  |  |  |  |  |  |  |  |  |  |  |  |  |  |  |  |  |  |  |  |  |  |  |  |  |  |  |  |  |  |  |  |  |  |  |  |  |  |  |  |  |  |  |  |  |  |  |  |  | </ |



Table 1.11 Continued

[illegible]

Table 1.11 Continued

[illegible]

Table 1.11 Continued

|      |                           |        |        |        |     |        |        |        |        |        |          |        |        |           |         |         |        |        |                |
|------|---------------------------|--------|--------|--------|-----|--------|--------|--------|--------|--------|----------|--------|--------|-----------|---------|---------|--------|--------|----------------|
| RBCM | RBCM.EH2008.011.10503.001 | 29.4   | 26.8 a | 0.91 e | 5   | 32.5   | 33 a   | 1.01 e | 28.3   | 7      | 7.7      | 6.2 a  | 38 a   | 54.5 e    | 13.5 e  | 26 d    | s      | 0.8    | ○ <sub>3</sub> |
| RBCM | RBCM.EH2008.011.10506.001 | 30.3 e |        |        | 8 e | 31.5 e |        |        | 33.8 e | 8 e    | 24.7     | 19.7   | 53     | 53 e ±5   | 19.3    | 27.8    | s      |        | ○ <sub>3</sub> |
| RBCM | RBCM.EH2008.011.10572.001 | 31.3   |        |        | 7   | 37.5   |        |        | 37.5   | 9      | 19.5     | 14.7 a | 42.5 a |           |         |         | dx     |        | ○ <sub>3</sub> |
| RBCM | RBCM.EH2008.011.10641.001 | 31.5   | 32.4   | 1.03   | 6   | 31.8   | 39.3   | 1.24   | 29.6   | 6      | 6.2      | 3.8    | 40.5   |           |         |         |        | 0.7    | ○ <sub>3</sub> |
| RBCM | RBCM.EH2016.010.0006.004  | 32.4   |        |        | 4   | 32.4   | 29.4 d |        | 33     | 6      | 10.3     | 5.8    | 44.9   |           |         |         |        | 0.8    | ○ <sub>3</sub> |
| RBCM | RBCM.EH2008.011.10563.001 | 32.9   | 36.3   | 1.11   | 9   | 32.4 a | 35.8   | 1.11   | 32.4   | 35.4   | 1.1      | 13.2   | 28.7   |           | 41.4    | 29.5    | 32.7   | 1.11   | ○ <sub>3</sub> |
| RBCM | RBCM.EH2008.011.10507.001 | 33 d   |        |        |     | 31.8   | 35 e   | 1.1 e  | 32     | 32.6 e | 1.02 e   | 7 a    | 4.8 e  |           |         |         | s      | 0.7    | ○ <sub>3</sub> |
| RBCM | RBCM.EH2008.011.10561.001 | 34.1   | 31 e   | 0.91 e | 9   | 37.6 e |        |        | 38.5   | 40.8 a | 1.06 e   | 10     | 19.8   | 19        | 38.9    | 45.6    | 16.5 e | 15     | ○ <sub>3</sub> |
| RBCM | RBCM.EH2008.011.10612.001 | 34.5   |        |        | 7   | 34.4   |        |        | 36.4   | 8      | 10.7     | 9.7 a  | 35.5 a | 36.8      | 24 e ±1 |         | dx     | 1      | ○ <sub>3</sub> |
| RBCM | RBCM.EH2008.011.10554.001 | 35.5 a | 32 a   | 0.90 e | 6 a |        |        |        |        |        |          |        |        |           |         |         | dx     | 1      | ○ <sub>3</sub> |
| RBCM | RBCM.EH2008.011.10550.001 | 35.5 d |        |        | 7 d | 37 d   |        |        | 38 d   |        | 10 d     |        |        |           |         |         | dx     | 0.5    | ○ <sub>3</sub> |
| RBCM | RBCM.EH2008.011.10532.001 | 36.3 e |        |        | 6 e | 37 d   |        |        | 37 e   | 7 e    | 20.5 e   | 17.8   | 41.5   | 56        | 27.2    | 30 a    | dx     | 1.1    | ○ <sub>3</sub> |
| RBCM | RBCM.EH2008.011.10564.001 | 36.4   | 36.7   | 1.01   | 8   | 37.6   | 38.9   | 1.03   | 36.7   | 35.1   | 0.96     | 9      | 20.4   | 20.4      | 32.3    | 29.3    | 17.6   | 26.8   | ○ <sub>3</sub> |
| RBCM | RBCM.EH2008.011.10588.001 | 36.8   | 35     | 0.95   | 6   | 40.8   |        |        |        |        |          |        |        |           | 51      |         | dx     | 0.9    | ○ <sub>3</sub> |
| RBCM | RBCM.EH2008.011.10580.001 | 37.7   | 35.4   | 0.94   | 8   | 37.7 a | 39.9 a | 1.06   | 38     | 38.5   | 1.01     | 9      | 20     |           | 39      | 11 d ±2 | s      | 0.8    | ○ <sub>3</sub> |
| RBCM | RBCM.EH2008.011.10504.001 | 39     |        |        | 7   | 37.4   |        |        | 39.7   | 8      | 15.9     | 15.7 e | 38.7 e | 40.5 e    |         |         | dx     | 0.8    | ○ <sub>3</sub> |
| RBCM | RBCM.EH2008.011.10607.001 | 40     |        |        | 8 e | 42.6 e |        |        |        |        |          |        |        |           |         |         |        |        | ○ <sub>3</sub> |
| RBCM | RBCM.EH2008.011.10533.001 | 40 a   |        |        | 8 e | 48 e   |        |        | 47 e   | 11 e   | 40.9 e   | 41.2   | 61.9   | 72        |         |         | s      |        | ○ <sub>3</sub> |
| RBCM | RBCM.EH2008.011.10552.001 | 40 e   |        |        | 7 e | 41.6   | 46.2 a | 1.11 e | 45.3   | 8      | 17.6     | 14.2 e | 44.9 e |           | 19.5 e  | 36 e    | dx     | 0.9    | ○ <sub>3</sub> |
| RBCM | RBCM.EH2008.011.10648.001 | 41.1 a |        |        | 7 e |        |        |        |        |        | 18.8 a   |        |        |           |         |         | s      |        | ○ <sub>3</sub> |
| RBCM | RBCM.EH2008.011.10568.001 | 45     |        |        | 7   | 44.4   |        |        | 45.5 a | 9 a    | 15.5 e   | 11.7 e | 50.4   | 32.4      | 44 e    | 37 e    | 12° e  | s      | ○ <sub>3</sub> |
| RBCM | RBCM.EH2008.011.10593.001 | 45.7 d |        |        | 6 e | 51.5 d |        |        | 48.7   | 8      | 42.7     | 43 e   | 60     | 33 e ±1   | 35.3    | 39.5 d  | s      | 2.6    | ○ <sub>3</sub> |
| RBCM | RBCM.EH2008.011.10556.001 | 50 e   |        |        | 8 e | 57.8   |        |        | 56.5 e | 9 e    | 36 e     | 35.7 e | 54.6 e | 61 e      | 40      |         | s      | 1.4    | ○ <sub>3</sub> |
| RBCM | RBCM.EH2008.011.10553.001 | 50.5 a | 48.9 a | 0.97 e | 7   |        |        |        |        |        |          |        |        |           |         |         | s      |        | ○ <sub>3</sub> |
| RBCM | RBCM.EH2008.011.10494.001 | 51 e   |        |        | 7 e | 49.4   |        |        | 52.2   | 10     | 34.5     |        | 59.8   |           |         |         | s      | 1.1    | ○ <sub>3</sub> |
| RBCM | RBCM.EH2008.011.10589.001 | 53 a   |        |        | 9 a | 54.3 a |        |        | 55 d   | 9 d    | 43.4     | 42.9 a | 65.6 a |           |         |         | s      | 0.8    | ○ <sub>3</sub> |
| RBCM | RBCM.EH2008.011.10549.001 |        |        |        |     |        |        |        | 38.6   | 41.6   | 1.08     | 10     | 48 d   |           |         |         | s      | 0.5    | ○ <sub>3</sub> |
| RBCM | RBCM.EH2008.011.10606.001 |        |        |        |     |        |        |        | 41 e   | 8 e    |          |        |        |           |         |         |        |        | ○ <sub>3</sub> |
| RBCM | RBCM.EH2008.011.10497.001 |        |        |        |     | 42 a   |        |        | 42 a   | 8 a    | 25.8 e   |        |        |           |         |         |        |        | ○ <sub>3</sub> |
| RBCM | RBCM.EH2008.011.10560.001 |        |        |        |     |        |        |        | 44 e   | 7 e    |          |        | 69 e   |           |         |         |        | 0.6    | ○ <sub>3</sub> |
| RBCM | RBCM.EH2008.011.10492.001 |        |        |        |     |        |        |        | 44.5 d | 8 e    |          |        |        |           |         |         |        |        | ○ <sub>3</sub> |
| RBCM | RBCM.EH2008.011.10578.001 |        |        |        |     | 45 d   |        |        | 45 d   | 9 d    |          |        |        |           |         |         |        | 0.9    | ○ <sub>3</sub> |
| RBCM | RBCM.EH2008.011.10496.001 |        |        |        |     | 45 a   |        |        | 45 a   | 9 e    | 25 e     |        |        |           |         |         |        |        | ○ <sub>3</sub> |
| RBCM | RBCM.EH2008.011.10558.001 |        |        |        |     | 46.2   | 51.4   | 1.11   |        |        |          |        |        |           |         |         |        |        | ○ <sub>3</sub> |
| RBCM | RBCM.EH2008.011.10576.001 |        |        |        |     | 47.9   | 55 d   | 1.15 e |        |        |          |        |        |           |         |         | dx     |        | ○ <sub>3</sub> |
| RBCM | RBCM.EH2008.011.10562.001 |        |        |        |     | 48.3   | 50.4   | 1.04   |        |        |          |        |        |           |         |         |        | 2.7    | ○ <sub>3</sub> |
| RBCM | RBCM.EH2008.011.10581.001 |        |        |        |     | 50.8   |        |        | 51 a   | 11 a   | 37 d ±2  |        |        |           |         |         |        |        | ○ <sub>3</sub> |
| RBCM | RBCM.EH2008.011.10582.001 | 53 d   |        |        | 7 e | 53 a   |        |        | 58 a   | 10 e   | 29 d     | 25 d   | 66.9   | 35.9 e ±2 |         |         | dx     | 1.4    | ○ <sub>3</sub> |
| RBCM | RBCM.EH2008.011.10573.001 |        |        |        |     | 54 d   |        |        | 55 a   | 7 a    | 40.3 a   |        | 38 d   |           |         |         |        | 2      | ○ <sub>3</sub> |
| RBCM | RBCM.EH2008.011.10566.001 |        |        |        |     | 55.6   |        |        | 55 e   | 9 e    | 39.7 e   |        | 57.2   |           |         |         |        | 1.5 e  | ○ <sub>3</sub> |
| RBCM | RBCM.EH2016.005.0020.001  | 22.4 a | 21.4 a | 0.96 a | 5 a | 22.5 a |        |        | 23.9 a | 6 a    | 3.3 a    |        | 24.7 a | 41.5 d    | 14.5 a  | 20.8 e  | s      | 0.5    | ○ <sub>3</sub> |
| RBCM | RBCM.EH2016.005.0008.001  | 23.7   | 24.8 a | 1.05 a | 6   | 22.9   | 25 a   | 1.09 a | 23.7   | 8      | 1.9      | 1.6    | 27.5   |           | 27.5 a  |         | s      | 0.6    | ○ <sub>3</sub> |
| RBCM | RBCM.EH2016.008.0006.001  | 25 a   |        |        | 4 a | 26.3   | 24.2   | 0.92   | 26 a   | 5 a    | 6.8 d ±2 |        |        |           |         |         |        | 0.6    | ○ <sub>3</sub> |
| RBCM | RBCM.EH2016.005.0019.001  | 25.9 d |        |        | 5 d | 28.6 d |        |        | 27.8 a | 5 a    | 11.4 a   | 9.5 a  | 33.5 a |           | 49.2    | 22.3 a  | s      | 0.7    | ○ <sub>3</sub> |
| RBCM | RBCM.EH2016.007.0003.001  | 34.7 a | 35.1 a | 1.01 a | 6 a |        |        |        |        |        |          |        |        | < 16 a    |         | 29 d    | 28.1 d | 0.97 d | ○ <sub>3</sub> |
| RBCM | RBCM.EH2016.007.0001.001  | 51 a   |        |        | 7 a | 52.9 d |        |        | 52.7 a | 10 a   | 39 a     |        |        |           |         |         | 72°    | 20° e  | ○ <sub>3</sub> |
|      |                           |        |        |        |     |        |        |        |        |        |          |        |        |           |         |         | dx     | 1      | ○ <sub>3</sub> |

Table 1.12

| <i>Nostoceras (Nostoceras) aff. pauper</i> (Whitfield, 1892) |                           |             | Limbs & Body Chambers          |        |       |     |                                |      |      |        |                                |    |      |        |                                |         | Helical Whorls    |                  |                                |      |    |      |     |      |      |       |       |       |     |     |
|--------------------------------------------------------------|---------------------------|-------------|--------------------------------|--------|-------|-----|--------------------------------|------|------|--------|--------------------------------|----|------|--------|--------------------------------|---------|-------------------|------------------|--------------------------------|------|----|------|-----|------|------|-------|-------|-------|-----|-----|
| Repository                                                   | Accession No.             | In-text No. | D <sub>1</sub> -V <sub>1</sub> |        |       |     | D <sub>2</sub> -V <sub>2</sub> |      |      |        | D <sub>3</sub> -V <sub>3</sub> |    |      |        | Limb Proximity                 |         |                   |                  | F <sub>1</sub> -F <sub>2</sub> |      |    | Cv   |     |      |      |       |       | Shell |     |     |
|                                                              |                           |             | Wh                             | Wb     | Wb/h  | Ci  | Wh                             | Wb   | Wb/h |        | Wh                             | Wb | Wb/h | Ci     | D <sub>1</sub> -D <sub>3</sub> | -Dp-Dp  | Dp-D <sub>2</sub> | P-D <sub>2</sub> | F <sub>2</sub> -Dp             | Wh   | Wb | Wb/h | Cv  | U    | Cd   | U/Cd  | Ap    | H     | C   | T   |
| RBCM                                                         | RBCM.EH2008.011.10356.001 | RBCM.86     |                                |        |       |     |                                |      |      |        |                                |    |      |        |                                |         |                   |                  |                                |      |    |      | 12  | 5.1  | 27.1 | 0.19  | 40°   |       | dx  |     |
| RBCM                                                         | RBCM.EH2008.011.10358.001 | RBCM.87     |                                |        |       |     |                                |      |      |        |                                |    |      |        |                                |         |                   |                  |                                |      |    |      | 12  | 7    | 36.7 | 0.19  | 60°   |       | s   |     |
| RBCM                                                         | RBCM.EH2015.003.0012.001  | RBCM.88     | 22.7 e                         | 29.6 e | 1.3 e | 6 e | 27.5 a                         |      |      |        |                                |    |      |        |                                | 29 e ±1 |                   |                  |                                | 27.9 |    |      | 13  | 2.9  | 15.5 | 0.19  | 52°   | 15°   | s   |     |
| RBCM                                                         | RBCM.EH2008.011.06049.001 | RBCM.89     | 24.9                           | 23.8   | 0.96  | 6   | 23.5                           | 24.1 | 1.03 | 24.3 a |                                |    | 7 a  | 13.8   | 13.8                           | 14.9    | 27.3 e ±1.7       |                  |                                |      |    |      | 11  | 7.6  | 43   | 0.18  | 52°   | 12°   | dx  | 0.7 |
| RBCM                                                         | RBCM.EH2015.021.0002.001  | RBCM.90     |                                |        |       |     | 29.3                           |      |      |        |                                |    |      |        | 15.1                           | 19.6 a  |                   |                  | 19                             |      |    | 13   | 9.5 | 53   | 0.18 | 40°   | 15° d | dx    |     |     |
| RBCM                                                         | RBCM.EH2008.011.10364.001 | RBCM.91     |                                |        |       |     |                                |      |      |        |                                |    |      |        |                                |         |                   |                  | 28.5                           | 28.4 |    | 12   |     |      |      | 50°   | 11°   | dx    | 0.6 |     |
| RBCM                                                         | RBCM.EH2008.011.10362.001 | RBCM.92     |                                |        |       |     |                                |      |      |        |                                |    |      |        |                                |         |                   |                  |                                |      |    | 11   | 5.9 | 36.1 | 0.13 | 50°   |       | s     |     |     |
| RBCM                                                         | RBCM.EH2008.011.10368.001 | RBCM.93     |                                |        |       |     |                                |      |      |        |                                |    | 20.7 | 26.7 e |                                |         |                   |                  |                                |      |    |      |     |      |      |       |       | 13°   | s   | 0.8 |
| RBCM                                                         | RBCM.EH2008.011.10359.001 |             | 26.4 d                         |        |       | 5 d | 25.5 d                         |      |      | 25.8 d |                                |    | 6 d  | 12.5   | 12.5                           | 19      | 16.8              | 7.7              |                                |      |    | 12   | 9.5 | 49.9 | 0.19 | 50° d | 18°   | dx    | 0.8 |     |
| RBCM                                                         | RBCM.EH2008.011.10365.001 |             | 20.9                           |        |       | 5 d | 24 d                           |      |      | 24 d   |                                |    | 6 d  | 5.3 d  | 5.3 d                          | 23      |                   | 5.8 d            | 18.7 d                         |      |    |      |     |      |      |       |       |       | dx  | 0.6 |
| RBCM                                                         | RBCM.EH2008.011.10357.001 |             |                                |        |       |     |                                |      |      |        |                                |    |      |        |                                |         |                   |                  |                                |      |    | 11   | 4.3 | 30.9 | 0.14 |       |       |       | dx  |     |
| RBCM                                                         | RBCM.EH2008.011.10361.001 |             |                                |        |       |     |                                |      |      |        |                                |    |      |        |                                |         |                   |                  |                                |      |    | 12   | 5.3 | 41.1 | 0.13 | 48° d |       | s     | 0.4 |     |
| RBCM                                                         | RBCM.EH2008.011.10411.001 |             |                                |        |       |     |                                |      |      |        |                                |    |      |        |                                |         |                   |                  |                                |      |    |      |     | 5.9  | 42.6 | 0.16  | 56°   |       | s   |     |
| RBCM                                                         | RBCM.EH2008.011.10366.001 |             |                                |        |       |     |                                |      |      |        |                                |    |      |        |                                |         |                   |                  |                                |      |    | 11   |     |      |      | 46°   |       | dx    |     |     |
| RBCM                                                         | RBCM.EH2016.006.0001.001  |             |                                |        |       |     |                                |      |      |        |                                |    |      |        |                                |         |                   |                  |                                |      |    | 13   |     |      |      | 60°   |       | dx    | 0.3 |     |

## References

- Defrance, M. J.** 1816. *Dictionnaire des Sciences naturelles, dans lequel on traite méthodiquement des différents Etres de la Nature* 3. Levrault, Paris & Strasbourg.
- Gill, T.** 1871. Arrangement of the families of mollusks. *Smithsonian Miscellaneous Collections*, **227**, 1–49.
- Hyatt, A.** 1894. Phylogeny of an acquired characteristic. *Proceedings of the American Philosophical Society*, **32**, 349–647, 14 pls.
- Kennedy, W. J.** 1986. The ammonoid fauna of the type Maastrichtian with a revision of *Ammonites colligatus* Binkhorst, 1861. *Bulletin de l'Institut Royal des Sciences Naturelles de Belgique, Sciences de la Terre*, **56**, 151–267, 37 pls.
- Schlüter, C.** 1872. Die Cephalopoden der oberen deutschen Kreide. *Palaeontographica*, **21**, 25–120, 9–35 pls.
- Shigeta, Y. & Nishimura, T.** 2013. A New Species of the Heteromorph Ammonite *Phylloptychoceras* from the Lowest Maastrichtian of Hokkaido, Japan. *Paleontological Research*, **17** (2), 173–178.
- Spath, L. F.** 1926. On new ammonoids from the English Chalk. *Geological Magazine*, **63**, 77–83.
- Stephenson, L. W.** 1941. The larger invertebrate fossils of the Navarro Group of Texas (exclusive of corals and crustaceans and exclusive of the fauna of the Escondido formation). *University of Texas Publication*, **4101**, 641 pp., 95 pls.
- Whiteaves, J. F.** 1895. Notes on some fossils from the Cretaceous rocks of British Columbia with descriptions of two species that appear to be new. *Canadian Record of Science*, **6**(6), 313–318, 1 pl.
- Whitfield, R. P.** 1892. Gasteropoda [sic] and Cephalopoda of the Raritan Clays and Greensand Marls of New Jersey. *U. S. Geological Survey Monograph*, **18**, 402 pp., 50 pls.
