# Supplementary material
Source: publisher figshare collection journal article supplement (https://tandf.figshare.com/articles/dataset/_/5505022)
Supplement: Supplementary file 2 [file 1]

### **Appendix 3. Glossary of terms**

Terminology modified from Henderson & Henderson (1920), Landman *et al.* (1996), and Arkell *et al.* (1957).

**Ancylocone:** a shell characterized by a planispiral or helical coil followed by a shaft or hook.

**Ammonitella:** The embryonic shell of an ammonoid terminating at the nepionic—or primary—constriction.

**Antidimorph:** one of the two opposite members of a sexually dimorphic pair.

**Aperture:** the shell opening at the end of the body chamber.

**Apical angle:** the predominant angle of whorl expansion from a helical apex as an expression of translation rate defined as follows: *Low* =  $Ap < 45^\circ$ ; *Moderate* =  $45^\circ \leq Ap < 90^\circ$ ; *High* =  $Ap \geq 90^\circ$

**Bifurcate:** to divide in two; relating to ribs which split apart in approach to the venter.

**Body chamber:** the portion of the shell which accommodates the bulk of the organism.

**Camerae:** the gas and fluid chambers within the phragmocone used by the organism to control buoyancy.

**Costa:** a radial rib or ridge on the shell exterior which is not present on the internal mould.

**Costal index:** the number of costae along the flank over a distance equal to whorl height.

**Coil:** relating to a whorl turning around a central axis (see *planispiral*, *helical*).

**Constriction:** zone of impression with borders clearly demarcated by costae expressed as an inset furrow or notch-like plication often visible on the shell internal mould; continuous or discontinuous around the whorl circumference; depth—and occasionally breadth—exceeding that typical of costal interspaces within a given growth program; may represent a hiatus in shell development or punctuation of the baseline growth program, commonly associated with megastriae.

**Contiguity:** the degree to which whorls are in contact defined as follows: *Low* = whorls only slightly touching or with trailing flank costal depression; *Moderate* = trailing flank flattened or with slightly concave zone of impression; *High* = whorls tightly impressed with deep trailing flank furrow.

**Dextral:** mode of coiling to the right, in a clockwise direction.

**Dimorphism:** the presence of two distinct forms within the same species generally attributed to sexual differences.

**Elbow:** a section of limb recurvature in a heteromorph ammonite conch characterized by a bend of at 90° or less.

**Foliole:** a minor incision within a saddle (see *suture line*).

**Furrow:** a channel or groove characterized as a concave point of contact between two shell surfaces or the interspatial depression between costae.

**Gyrocone:** or *criocone*; a heteromorphic shell consisting of a planispiral coil with multiple whorls.

**Hamiticone:** a shell consisting of two or more straight limbs or shafts.

**Helical:** relating to whorl progression turning around an axis in a three-dimensional spiral.

**Intercalary:** of or relating to costae which are discontinuous around the whorl circumference, typically terminating along the flanks; occasionally referred to as secondary (discontinuous ) ribs ‘inserted’ between primary (continuous) ribs.

**Limb:** a straight section of heteromorph ammonite shell free of helical coiling belonging to a conch characterized by multiple elongated sections.

**Lira:** a fine costa characterized as a minor ridge on the shell surface.

**Lobe:** a posteriorly (or apically) directed incision in the suture line.

**Lobule:** a minor incision within a lobe (see *suture line*).

**Macroconch:** the typically larger shell in a sexually dimorphic species considered to have accommodated the female animal.

**Megastria:** a prominent, thick, flared costa exceeding the height of those predominant throughout conch development; continuous or discontinuous around the whorl circumference; may represent a hiatus in shell development or punctuation of the baseline growth program, commonly associated with constrictions.

**Microconch:** the typically smaller shell in a sexually dimorphic species considered to have accommodated the male animal.

**Multicostate:** having costae that are numerous and closely spaced.

**Nepionic:** of or relating to the primary constriction immediately following the ammonitella.

**Neanoconch:** the juvenile shell extending up to two volutions beyond the ammonitella.

**Orthocone:** a shell consisting of a single straight or curving shaft.

**Paucicostate:** having costae that are widely spaced.

**Peristome:** the outer edge of the ammonite aperture.

**Planispiral:** relating to bilaterally symmetrical whorl progression around an axis on a single plane.

**Plication:** a furrow, or costal interspace which is present on the internal mould.

**Phragmocone:** the portion of an ammonite shell consisting of the gas and fluid chambers, or camerae.

**Phylloid:** being phylloceratoid in form with respect to rounded sutural elements.

**Prorsiradiate:** the direction of a costa that is slanting forward (adaperturally) toward the venter.

**Protoconch:** The portion of the ammonitella up to the first septal wall.

**Polymorphism:** the presence of a range of forms within the same species.

**Rectiradiate:** a radial costa perpendicular to the direction of shell growth that is slanting neither forward nor backward.

**Retroversal:** the terminal portion of a mature heteromorph ammonite shell comprising the body chamber which curves backwards in the direction of the juvenile conch.

**Rursiradiate:** the direction of a costa that is slanting backward (more adapically) toward the dorsum.

**Saddle:** an anteriorly (or adaperturally) directed incision in the suture line between lobes.

**Septa:** the walls which separate the camerae and provide structural support to the phragmocone in shelled cephalopods.

**Septal approximation:** the crowding of septal walls occurring at the onset of sexual maturity.

**Sinistral:** a mode of coiling to the left, in a counter clockwise direction.

**Suture line:** or *septal suture*, the often complex pattern occurring at the point of contact between a septal wall and the outer shell; in late Cretaceous heteromorph ammonites, the suture line consists of four distinct undulating lobes and three saddles.

**Torticone:** a shell coiled in a three-dimensional spiral.

**Umbilicus:** in ancyloconic and torticonic heteromorph ammonites, the breadth of space between the helical whorls centered on the axis of coiling.

**Volution:** a complete 360° revolution of shell.

**Whorl:** a generic term for any segment of shell which at one point enclosed the animal; in ammonite taxonomy, applied when considering shell dimensions—coiled, helical or otherwise—having origins in the premise of curvature.

## References

- Arkell, W. J., Kummel, B., Miller, A. K. & Wright, C. W.** 1957. Morphological terms applied to Ammonoidea. Pp. L2–L6 in R. C. Moore (ed.) *Treatise on Invertebrate Paleontology, Part L, Mollusca 4, Treatise on Invertebrate Paleontology, Part L, Mollusca 4, Cephalopoda—Ammonoidea*. Geological Society of America, Boulder & University of Kansas Press, Lawrence.
- Henderson, I. F. & Henderson, W. D.** 1920. A dictionary of scientific terms: pronunciation, derivation, and definition of terms in biology, botany, zoology, anatomy, cytology, embryology, physiology. Oliver & Boyd, Edinburgh. 376 pp.
- Landman, N. H., Tanabe, K., Shigeta, Y.** 1996. Glossary. Pp. 825–843 in N. H. Landman, K. Tanabe & R. A. Davis (eds) *Ammonoid Paleobiology, Topics in Geobiology*, **13**. Plenum Press, New York.
