# Supplementary material
Source: publisher figshare collection journal article supplement (https://tandf.figshare.com/articles/dataset/_/5505022)
Supplement: Supplementary file 3 [file 1]

## **Appendix 1. List of all studied heteromorph ammonite specimens from the Northumberland Formation, Hornby Island**

Ordered alphabetically by family, taxon, institutional abbreviation, and institutional accession number.

| <b>Repository</b> | <b>Accession No.</b>      | <b>In-text No.</b> | <b>Family</b>                | <b>Taxon</b>                                                      |
|-------------------|---------------------------|--------------------|------------------------------|-------------------------------------------------------------------|
| RBCM              | RBCM.EH2008.011.09934.03  |                    | Baculitidae Gill, 1871       | <i>Fresvillia constricta</i> Kennedy, 1986                        |
| RBCM              | RBCM.EH2008.011.09934.05  |                    | Baculitidae Gill, 1871       | <i>Fresvillia constricta</i> Kennedy, 1986                        |
| RBCM              | RBCM.EH2008.011.10672.001 | RBCM.3             | Baculitidae Gill, 1871       | <i>Fresvillia constricta</i> Kennedy, 1986                        |
| RBCM              | RBCM.EH2014.003.0001.002  | RBCM.2             | Baculitidae Gill, 1871       | <i>Fresvillia constricta</i> Kennedy, 1986                        |
| RBCM              | RBCM.EH2014.003.0001.003  |                    | Baculitidae Gill, 1871       | <i>Fresvillia constricta</i> Kennedy, 1986                        |
| RBCM              | RBCM.EH2014.003.0001.004  |                    | Baculitidae Gill, 1871       | <i>Fresvillia constricta</i> Kennedy, 1986                        |
| RBCM              | RBCM.EH2014.003.0001.005  |                    | Baculitidae Gill, 1871       | <i>Fresvillia constricta</i> Kennedy, 1986                        |
| RBCM              | RBCM.EH2014.003.0001.006  |                    | Baculitidae Gill, 1871       | <i>Fresvillia constricta</i> Kennedy, 1986                        |
| RBCM              | RBCM.EH2014.003.0001.007  |                    | Baculitidae Gill, 1871       | <i>Fresvillia constricta</i> Kennedy, 1986                        |
| RBCM              | RBCM.EH2014.003.0001.008  |                    | Baculitidae Gill, 1871       | <i>Fresvillia constricta</i> Kennedy, 1986                        |
| RBCM              | RBCM.EH2014.003.0001.009  |                    | Baculitidae Gill, 1871       | <i>Fresvillia constricta</i> Kennedy, 1986                        |
| RBCM              | RBCM.EH2014.003.0001.010  |                    | Baculitidae Gill, 1871       | <i>Fresvillia constricta</i> Kennedy, 1986                        |
| RBCM              | RBCM.EH2014.003.0001.011  |                    | Baculitidae Gill, 1871       | <i>Fresvillia constricta</i> Kennedy, 1986                        |
| RBCM              | RBCM.EH2014.003.0001.012  |                    | Baculitidae Gill, 1871       | <i>Fresvillia constricta</i> Kennedy, 1986                        |
| RBCM              | RBCM.EH2014.003.0001.013  |                    | Baculitidae Gill, 1871       | <i>Fresvillia constricta</i> Kennedy, 1986                        |
| RBCM              | RBCM.EH2014.003.0001.014  |                    | Baculitidae Gill, 1871       | <i>Fresvillia constricta</i> Kennedy, 1986                        |
| RBCM              | RBCM.EH2014.003.0001.015  |                    | Baculitidae Gill, 1871       | <i>Fresvillia constricta</i> Kennedy, 1986                        |
| RBCM              | RBCM.EH2014.003.0001.016  |                    | Baculitidae Gill, 1871       | <i>Fresvillia constricta</i> Kennedy, 1986                        |
| RBCM              | RBCM.EH2016.006.0002.001  |                    | Baculitidae Gill, 1871       | <i>Fresvillia constricta</i> Kennedy, 1986                        |
| CDM               | 993.79.1                  |                    | Diplomoceratidae Spath, 1926 | <i>Diplmomoceras (Diplomoceras) cylindraceum</i> (Defrance, 1816) |
| CDM               | 993.111.2                 |                    | Diplomoceratidae Spath, 1926 | <i>Diplmomoceras (Diplomoceras) cylindraceum</i> (Defrance, 1816) |
| CDM               | 993.169.1                 |                    | Diplomoceratidae Spath, 1926 | <i>Diplmomoceras (Diplomoceras) cylindraceum</i> (Defrance, 1816) |
| CDM               | 996.219.1                 |                    | Diplomoceratidae Spath, 1926 | <i>Diplmomoceras (Diplomoceras) cylindraceum</i> (Defrance, 1816) |
| CDM               | 998.1.508 COP             |                    | Diplomoceratidae Spath, 1926 | <i>Diplmomoceras (Diplomoceras) cylindraceum</i> (Defrance, 1816) |
| CDM               | 2002.76.1                 |                    | Diplomoceratidae Spath, 1926 | <i>Diplmomoceras (Diplomoceras) cylindraceum</i> (Defrance, 1816) |
| CDM               | 2008.1.4 HUN              |                    | Diplomoceratidae Spath, 1926 | <i>Diplmomoceras (Diplomoceras) cylindraceum</i> (Defrance, 1816) |
| CDM               | 2008.1.5 HUN              |                    | Diplomoceratidae Spath, 1926 | <i>Diplmomoceras (Diplomoceras) cylindraceum</i> (Defrance, 1816) |
| CDM               | 2008.1.12 HUN             |                    | Diplomoceratidae Spath, 1926 | <i>Diplmomoceras (Diplomoceras) cylindraceum</i> (Defrance, 1816) |
| CDM               | 2008.1.23 HUN             |                    | Diplomoceratidae Spath, 1926 | <i>Diplmomoceras (Diplomoceras) cylindraceum</i> (Defrance, 1816) |
| CDM               | 2008.1.29 HUN             |                    | Diplomoceratidae Spath, 1926 | <i>Diplmomoceras (Diplomoceras) cylindraceum</i> (Defrance, 1816) |
| CDM               | 2008.1.30 HUN             |                    | Diplomoceratidae Spath, 1926 | <i>Diplmomoceras (Diplomoceras) cylindraceum</i> (Defrance, 1816) |

**Continued**

[illegible]

**Continued**

[illegible]

**Continued**

[illegible]

**Continued**

[illegible]

**Continued**

[illegible]

## Continued

|      |                           |         |                              |                                                                      |
|------|---------------------------|---------|------------------------------|----------------------------------------------------------------------|
| RBCM | RBCM.EH2008.011.10238.001 | RBCM.21 | Diplomoceratidae Spath, 1926 | <i>Diplomoceras (Diplomoceras) cf. cylindraceum</i> (Defrance, 1816) |
| RBCM | RBCM.EH2008.011.00425.001 | RBCM.25 | Diplomoceratidae Spath, 1926 | <i>Exiteloceras (Exiteloceras) densicostatum</i> sp. nov.            |
| RBCM | RBCM.EH2015.003.0002.001  | RBCM.28 | Diplomoceratidae Spath, 1926 | <i>Exiteloceras (Exiteloceras) densicostatum</i> sp. nov.            |
| RBCM | RBCM.EH2015.003.0003.001  | RBCM.26 | Diplomoceratidae Spath, 1926 | <i>Exiteloceras (Exiteloceras) densicostatum</i> sp. nov.            |
| RBCM | RBCM.EH2016.005.0017.001  | RBCM.27 | Diplomoceratidae Spath, 1926 | <i>Exiteloceras (Exiteloceras) densicostatum</i> sp. nov.            |
| RBCM | RBCM.EH2008.011.00424.001 | RBCM.30 | Diplomoceratidae Spath, 1926 | <i>Exiteloceras (Neancyloceras) aff. bipunctatum</i> Schlüter, 1872  |
| RBCM | RBCM.EH2008.011.10206.006 |         | Diplomoceratidae Spath, 1926 | <i>Exiteloceras (Neancyloceras) aff. bipunctatum</i> Schlüter, 1872  |
| RBCM | RBCM.EH2008.011.10206.007 |         | Diplomoceratidae Spath, 1926 | <i>Exiteloceras (Neancyloceras) aff. bipunctatum</i> Schlüter, 1872  |
| RBCM | RBCM.EH2008.011.10206.008 |         | Diplomoceratidae Spath, 1926 | <i>Exiteloceras (Neancyloceras) aff. bipunctatum</i> Schlüter, 1872  |
| RBCM | RBCM.EH2008.011.10212.001 | RBCM.33 | Diplomoceratidae Spath, 1926 | <i>Exiteloceras (Neancyloceras) aff. bipunctatum</i> Schlüter, 1872  |
| RBCM | RBCM.EH2008.011.10218.001 | RBCM.29 | Diplomoceratidae Spath, 1926 | <i>Exiteloceras (Neancyloceras) aff. bipunctatum</i> Schlüter, 1872  |
| RBCM | RBCM.EH2016.009.0004.002  | RBCM.32 | Diplomoceratidae Spath, 1926 | <i>Exiteloceras (Neancyloceras) aff. bipunctatum</i> Schlüter, 1872  |
| RBCM | RBCM.EH2016.009.0019.002  |         | Diplomoceratidae Spath, 1926 | <i>Exiteloceras (Neancyloceras) aff. bipunctatum</i> Schlüter, 1872  |
| RBCM | RBCM.EH2016.009.0022.001  | RBCM.31 | Diplomoceratidae Spath, 1926 | <i>Exiteloceras (Neancyloceras) aff. bipunctatum</i> Schlüter, 1872  |
| RBCM | RBCM.EH2016.009.0025.005  |         | Diplomoceratidae Spath, 1926 | <i>Exiteloceras (Neancyloceras) aff. bipunctatum</i> Schlüter, 1872  |
| RBCM | RBCM.EH2016.009.0025.006  |         | Diplomoceratidae Spath, 1926 | <i>Exiteloceras (Neancyloceras) aff. bipunctatum</i> Schlüter, 1872  |
| CDM  | 998.292.1                 |         | Diplomoceratidae Spath, 1926 | <i>Phylloptychoceras horitai</i> Shigeta & Nishimura, 2013           |
| CDM  | 2013.84.1                 |         | Diplomoceratidae Spath, 1926 | <i>Phylloptychoceras horitai</i> Shigeta & Nishimura, 2013           |
| RBCM | RBCM.EH2008.011.00334.001 | RBCM.52 | Diplomoceratidae Spath, 1926 | <i>Phylloptychoceras horitai</i> Shigeta & Nishimura, 2013           |
| RBCM | RBCM.EH2008.011.00338.001 | RBCM.50 | Diplomoceratidae Spath, 1926 | <i>Phylloptychoceras horitai</i> Shigeta & Nishimura, 2013           |
| RBCM | RBCM.EH2008.011.00389.002 |         | Diplomoceratidae Spath, 1926 | <i>Phylloptychoceras horitai</i> Shigeta & Nishimura, 2013           |
| RBCM | RBCM.EH2008.011.00420.001 |         | Diplomoceratidae Spath, 1926 | <i>Phylloptychoceras horitai</i> Shigeta & Nishimura, 2013           |
| RBCM | RBCM.EH2008.011.09759.006 | RBCM.51 | Diplomoceratidae Spath, 1926 | <i>Phylloptychoceras horitai</i> Shigeta & Nishimura, 2013           |
| RBCM | RBCM.EH2008.011.10200.001 |         | Diplomoceratidae Spath, 1926 | <i>Phylloptychoceras horitai</i> Shigeta & Nishimura, 2013           |
| RBCM | RBCM.EH2008.011.10201.001 |         | Diplomoceratidae Spath, 1926 | <i>Phylloptychoceras horitai</i> Shigeta & Nishimura, 2013           |
| RBCM | RBCM.EH2008.011.10202.001 | RBCM.38 | Diplomoceratidae Spath, 1926 | <i>Phylloptychoceras horitai</i> Shigeta & Nishimura, 2013           |
| RBCM | RBCM.EH2008.011.10202.002 |         | Diplomoceratidae Spath, 1926 | <i>Phylloptychoceras horitai</i> Shigeta & Nishimura, 2013           |
| RBCM | RBCM.EH2008.011.10202.003 |         | Diplomoceratidae Spath, 1926 | <i>Phylloptychoceras horitai</i> Shigeta & Nishimura, 2013           |
| RBCM | RBCM.EH2008.011.10202.004 |         | Diplomoceratidae Spath, 1926 | <i>Phylloptychoceras horitai</i> Shigeta & Nishimura, 2013           |
| RBCM | RBCM.EH2008.011.10202.005 |         | Diplomoceratidae Spath, 1926 | <i>Phylloptychoceras horitai</i> Shigeta & Nishimura, 2013           |
| RBCM | RBCM.EH2008.011.10203.001 | RBCM.49 | Diplomoceratidae Spath, 1926 | <i>Phylloptychoceras horitai</i> Shigeta & Nishimura, 2013           |
| RBCM | RBCM.EH2008.011.10215.002 |         | Diplomoceratidae Spath, 1926 | <i>Phylloptychoceras horitai</i> Shigeta & Nishimura, 2013           |
| RBCM | RBCM.EH2008.011.10216.001 |         | Diplomoceratidae Spath, 1926 | <i>Phylloptychoceras horitai</i> Shigeta & Nishimura, 2013           |
| RBCM | RBCM.EH2008.011.10216.002 |         | Diplomoceratidae Spath, 1926 | <i>Phylloptychoceras horitai</i> Shigeta & Nishimura, 2013           |
| RBCM | RBCM.EH2008.011.10216.003 |         | Diplomoceratidae Spath, 1926 | <i>Phylloptychoceras horitai</i> Shigeta & Nishimura, 2013           |

**Continued**

[illegible]

## Continued

|      |                           |         |                              |                                                                    |
|------|---------------------------|---------|------------------------------|--------------------------------------------------------------------|
| RBCM | RBCM.EH2008.011.10210.004 |         | Diplomoceratidae Spath, 1926 | <i>Solenoceras exornatus</i> sp. nov.                              |
| RBCM | RBCM.EH2008.011.10213.001 |         | Diplomoceratidae Spath, 1926 | <i>Solenoceras exornatus</i> sp. nov.                              |
| RBCM | RBCM.EH2008.011.10215.003 | RBCM.60 | Diplomoceratidae Spath, 1926 | <i>Solenoceras exornatus</i> sp. nov.                              |
| RBCM | RBCM.EH2016.009.0004.003  | RBCM.64 | Diplomoceratidae Spath, 1926 | <i>Solenoceras exornatus</i> sp. nov.                              |
| RBCM | RBCM.EH2016.009.0004.004  |         | Diplomoceratidae Spath, 1926 | <i>Solenoceras exornatus</i> sp. nov.                              |
| RBCM | RBCM.EH2016.009.0004.005  |         | Diplomoceratidae Spath, 1926 | <i>Solenoceras exornatus</i> sp. nov.                              |
| RBCM | RBCM.EH2016.009.0004.007  | RBCM.54 | Diplomoceratidae Spath, 1926 | <i>Solenoceras exornatus</i> sp. nov.                              |
| RBCM | RBCM.EH2016.009.0005.001  | RBCM.65 | Diplomoceratidae Spath, 1926 | <i>Solenoceras exornatus</i> sp. nov.                              |
| RBCM | RBCM.EH2016.009.0005.003  |         | Diplomoceratidae Spath, 1926 | <i>Solenoceras exornatus</i> sp. nov.                              |
| RBCM | RBCM.EH2016.009.0006.002  |         | Diplomoceratidae Spath, 1926 | <i>Solenoceras exornatus</i> sp. nov.                              |
| RBCM | RBCM.EH2016.009.0009.001  | RBCM.57 | Diplomoceratidae Spath, 1926 | <i>Solenoceras exornatus</i> sp. nov.                              |
| RBCM | RBCM.EH2016.009.0009.003  | RBCM.55 | Diplomoceratidae Spath, 1926 | <i>Solenoceras exornatus</i> sp. nov.                              |
| RBCM | RBCM.EH2016.009.0011.001  | RBCM.59 | Diplomoceratidae Spath, 1926 | <i>Solenoceras exornatus</i> sp. nov.                              |
| RBCM | RBCM.EH2016.009.0015.001  |         | Diplomoceratidae Spath, 1926 | <i>Solenoceras exornatus</i> sp. nov.                              |
| RBCM | RBCM.EH2016.009.0015.002  |         | Diplomoceratidae Spath, 1926 | <i>Solenoceras exornatus</i> sp. nov.                              |
| RBCM | RBCM.EH2016.009.0016.001  | RBCM.56 | Diplomoceratidae Spath, 1926 | <i>Solenoceras exornatus</i> sp. nov.                              |
| RBCM | RBCM.EH2016.009.0019.001  | RBCM.63 | Diplomoceratidae Spath, 1926 | <i>Solenoceras exornatus</i> sp. nov.                              |
| RBCM | RBCM.EH2016.009.0022.002  |         | Diplomoceratidae Spath, 1926 | <i>Solenoceras exornatus</i> sp. nov.                              |
| RBCM | RBCM.EH2016.009.0023.001  | RBCM.62 | Diplomoceratidae Spath, 1926 | <i>Solenoceras exornatus</i> sp. nov.                              |
| RBCM | RBCM.EH2016.009.0023.002  |         | Diplomoceratidae Spath, 1926 | <i>Solenoceras exornatus</i> sp. nov.                              |
| RBCM | RBCM.EH2016.009.0025.001  |         | Diplomoceratidae Spath, 1926 | <i>Solenoceras exornatus</i> sp. nov.                              |
| RBCM | RBCM.EH2016.009.0025.002  |         | Diplomoceratidae Spath, 1926 | <i>Solenoceras exornatus</i> sp. nov.                              |
| RBCM | RBCM.EH2016.009.0025.003  |         | Diplomoceratidae Spath, 1926 | <i>Solenoceras exornatus</i> sp. nov.                              |
| RBCM | RBCM.EH2016.009.0025.004  |         | Diplomoceratidae Spath, 1926 | <i>Solenoceras exornatus</i> sp. nov.                              |
| RBCM | RBCM.EH2015.003.0011.001  | RBCM.66 | Diplomoceratidae Spath, 1926 | <i>Solenoceras</i> cf. <i>reesidei</i> Stephenson, 1941            |
| RBCM | RBCM.EH2015.003.0011.002  |         | Diplomoceratidae Spath, 1926 | <i>Solenoceras</i> cf. <i>reesidei</i> Stephenson, 1941            |
| RBCM | RBCM.EH2015.003.0011.003  |         | Diplomoceratidae Spath, 1926 | <i>Solenoceras</i> cf. <i>reesidei</i> Stephenson, 1941            |
| CDM  | 2008.1.102 HUN            |         | Nostoceratidae Hyatt, 1894   | <i>Nostoceras</i> ( <i>Didymoceras</i> ?) <i>adrotans</i> sp. nov. |
| CDM  | 2008.1.104 HUN            |         | Nostoceratidae Hyatt, 1894   | <i>Nostoceras</i> ( <i>Didymoceras</i> ?) <i>adrotans</i> sp. nov. |
| GSC  | GSC 5955                  |         | Nostoceratidae Hyatt, 1894   | <i>Nostoceras</i> ( <i>Didymoceras</i> ?) <i>adrotans</i> sp. nov. |
| RBCM | RBCM.EH2008.011.00429.001 | RBCM.69 | Nostoceratidae Hyatt, 1894   | <i>Nostoceras</i> ( <i>Didymoceras</i> ?) <i>adrotans</i> sp. nov. |
| RBCM | RBCM.EH2008.011.10210.002 | RBCM.73 | Nostoceratidae Hyatt, 1894   | <i>Nostoceras</i> ( <i>Didymoceras</i> ?) <i>adrotans</i> sp. nov. |
| RBCM | RBCM.EH2008.011.10650.001 |         | Nostoceratidae Hyatt, 1894   | <i>Nostoceras</i> ( <i>Didymoceras</i> ?) <i>adrotans</i> sp. nov. |
| RBCM | RBCM.EH2008.011.10651.001 |         | Nostoceratidae Hyatt, 1894   | <i>Nostoceras</i> ( <i>Didymoceras</i> ?) <i>adrotans</i> sp. nov. |
| RBCM | RBCM.EH2008.011.10652.001 |         | Nostoceratidae Hyatt, 1894   | <i>Nostoceras</i> ( <i>Didymoceras</i> ?) <i>adrotans</i> sp. nov. |

**Continued**

[illegible]

## References

- Defrance, M. J.** 1816. *Dictionnaire des Sciences naturelles, dans lequel on traite méthodiquement des différents Etres de la Nature* 3. Levrault, Paris & Strasbourg.
- Gill, T.** 1871. Arrangement of the families of mollusks. *Smithsonian Miscellaneous Collections*, **227**, 1–49.
- Hyatt, A.** 1894. Phylogeny of an acquired characteristic. *Proceedings of the American Philosophical Society*, **32**, 349–647, 14 pls.
- Kennedy, W. J.** 1986. The ammonoid fauna of the type Maastrichtian with a revision of *Ammonites colligatus* Binkhorst, 1861. *Bulletin de l'Institut Royal des Sciences Naturelles de Belgique, Sciences de la Terre*, **56**, 151–267, 37 pls.
- Schlüter, C.** 1872. Die Cephalopoden der oberen deutschen Kreide. *Palaeontographica*, **21**, 25–120, 9–35 pls.
- Shigeta, Y. & Nishimura, T.** 2013. A New Species of the Heteromorph Ammonite *Phylloptychoceras* from the Lowest Maastrichtian of Hokkaido, Japan. *Paleontological Research*, **17** (2), 173–178.
- Spath, L. F.** 1926. On new ammonoids from the English Chalk. *Geological Magazine*, **63**, 77–83.
- Stephenson, L. W.** 1941. The larger invertebrate fossils of the Navarro Group of Texas (exclusive of corals and crustaceans and exclusive of the fauna of the Escondido formation). *University of Texas Publication*, **4101**, 641 pp., 95 pls.
- Whiteaves, J. F.** 1895. Notes on some fossils from the Cretaceous rocks of British Columbia with descriptions of two species that appear to be new. *Canadian Record of Science*, **6**(6), 313–318, 1 pl.
- Whitfield, R. P.** 1892. Gasteropoda [sic] and Cephalopoda of the Raritan Clays and Greensand Marls of New Jersey. *U. S. Geological Survey Monograph*, **18**, 402 pp., 50 pls.
